# Supplementary material for: A practical guide to calculate the isosteric heat/enthalpy of adsorption via adsorption isotherms in metal–organic frameworks, MOFs
Source: Royal Society of Chemistry journal article supplement (doi:10.1039/d0dt01784a), 2020-01-01
Supplement: d0dt01784a2.zip [file d0dt01784a2.zip]

## Sheet: HHU-1 Freundlich Langmuir fit
					Freundlich Langmuir fit from origin 77 K			a	5.04235	Freundlich Langmuir fit from origin 87 K		a	4.17907
								b	0.12359			b	0.05438
								c	0.60252			c	0.7091
	H2			H2				77.15	87.15
	77K			87 K		R [J/mol/K]	mmol/g	P kPa	P kPa			Hads [J/mol]	– Hads [KJ/mol]		mmol/g	– Hads [KJ/mol]
	kPa	mmol/g		kPa	mmol/g		0.01	0.00105418	0.0122589			-13715.1	13.7151		0.01	13.7151
	0.000439963	4.4615e-06		0.000333305	8.92299e-06		0.02	0.00334168	0.0326924			-12749	12.749		0.02	12.749
	0.0110524	0.0186134		0.000399966	1.33845e-05		0.03	0.00657143	0.0581102			-12184.1	12.1841		0.03	12.1841
	0.0135055	0.0185866		0.0035197	0.000575533		0.04	0.0106282	0.087483			-11783.4	11.7834		0.04	11.7834
	0.0140121	0.0192692		0.00407965	0.000695994	8.314	0.05	0.0154434	0.120246			-11472.7	11.4727		0.05	11.4727
	0.0141988	0.0195101		0.00590616	0.00110199		0.06	0.0209703	0.156035			-11219	11.219		0.06	11.219
	0.0143321	0.0197243		0.00714606	0.00139645		0.07	0.0271747	0.19459			-11004.6	11.0046		0.07	11.0046
	0.0143988	0.0198537		0.00802598	0.00160168		0.08	0.0340302	0.235719			-10818.9	10.8189		0.08	10.8189
	0.0144788	0.0200321		0.00862593	0.00173998		0.09	0.0415161	0.279273			-10655.2	10.6552		0.09	10.6552
	0.0204383	0.0274694		0.0109857	0.00222629		0.1	0.0496155	0.32513			-10508.8	10.5088		0.1	10.5088
	0.0513823	0.0622825		0.027971	0.00683501		0.12	0.0676015	0.423381			-10255.7	10.2557		0.12	10.2557
	0.066941	0.0779914		0.0455695	0.0115508		0.14	0.0879028	0.529868			-10041.9	10.0419		0.14	10.0419
	0.0820197	0.0922236		0.0654078	0.0167574		0.16	0.110458	0.644155			-9856.89	9.85689		0.16	9.85689
	0.110111	0.117052		0.0928054	0.0237575		0.18	0.135224	0.76592			-9693.89	9.69389		0.18	9.69389
	0.267151	0.232212		0.102031	0.0259079		0.2	0.162169	0.894917			-9548.25	9.54825		0.2	9.54825
	0.524795	0.370915		0.260964	0.0632016		0.22	0.191272	1.03096			-9416.67	9.41667		0.22	9.41667
	0.719765	0.455479		0.511557	0.114616		0.24	0.222518	1.17391			-9296.7	9.2967		0.24	9.2967
	0.814451	0.491769		0.721245	0.152302		0.26	0.255898	1.32366			-9186.5	9.1865		0.26	9.1865
	0.915829	0.528571		0.82073	0.169974		0.28	0.29141	1.48012			-9084.61	9.08461		0.28	9.08461
	1.01893	0.563875		0.914109	0.184706		0.3	0.329055	1.64324			-8989.89	8.98989		0.3	8.98989
	2.05704	0.835906		1.01386	0.201526		0.32	0.368836	1.81299			-8901.44	8.90144		0.32	8.90144
	3.03745	1.0143		2.03032	0.339676		0.34	0.410762	1.98933			-8818.48	8.81848		0.34	8.81848
	4.08772	1.16446		3.13336	0.459623		0.36	0.454844	2.17227			-8740.41	8.74041		0.36	8.74041
	5.13663	1.28708		3.99406	0.538373		0.38	0.501094	2.3618			-8666.69	8.66669		0.38	8.66669
	5.99982	1.3738		5.00973	0.62162		0.4	0.549528	2.55795			-8596.89	8.59689		0.4	8.59689
	7.02002	1.46547		6.02454	0.695213		0.42	0.600164	2.76073			-8530.63	8.53063		0.42	8.53063
	8.04988	1.54679		7.07091	0.765584		0.44	0.65302	2.97018			-8467.58	8.46758		0.44	8.46758
	9.07335	1.62014		8.12059	0.823619		0.46	0.70812	3.18634			-8407.47	8.40747		0.46	8.40747
	10.0959	1.68744		9.12768	0.87962		0.48	0.765484	3.40926			-8350.05	8.35005		0.48	8.35005
	12.7616	1.8394		10.143	0.932689		0.5	0.82514	3.639			-8295.1	8.2951		0.5	8.2951
	15.3102	1.96036		12.7777	1.05265		0.52	0.887112	3.87563			-8242.44	8.24244		0.52	8.24244
	17.8593	2.06494		15.1057	1.14474		0.54	0.951428	4.1192			-8191.9	8.1919		0.54	8.1919
	20.1902	2.15096		17.6556	1.23232		0.56	1.01812	4.36981			-8143.33	8.14333		0.56	8.14333
	25.3965	2.31678		20.2099	1.3134		0.58	1.08722	4.62752			-8096.59	8.09659		0.58	8.09659
	30.495	2.45007		25.4612	1.45849		0.6	1.15875	4.89243			-8051.57	8.05157		0.6	8.05157
	35.5799	2.56696		30.5046	1.57718		0.62	1.23276	5.16463			-8008.16	8.00816		0.62	8.00816
	40.683	2.67205		35.3747	1.67958		0.64	1.30927	5.44421			-7966.25	7.96625		0.64	7.96625
	45.5375	2.75804		40.4518	1.77552		0.66	1.38832	5.73129			-7925.77	7.92577		0.66	7.92577
	50.5982	2.84059		45.5551	1.86315		0.68	1.46996	6.02597			-7886.64	7.88664		0.68	7.88664
	55.6719	2.91914		50.6139	1.94218		0.7	1.55422	6.32836			-7848.77	7.84877		0.7	7.84877
	60.7654	2.98933		55.6958	2.01275		0.72	1.64114	6.63859			-7812.11	7.81211		0.72	7.81211
	65.8605	3.05008		60.7852	2.07514		0.74	1.73076	6.95678			-7776.58	7.77658		0.74	7.77658
	70.9371	3.1053		65.8481	2.14072		0.76	1.82313	7.28305			-7742.14	7.74214		0.76	7.74214
	76.0137	3.16239		70.9482	2.19565		0.78	1.91829	7.61755			-7708.74	7.70874		0.78	7.70874
	81.0651	3.21805		76.0012	2.25075		0.8	2.0163	7.96042			-7676.32	7.67632		0.8	7.67632
	86.1494	3.27259		81.0549	2.31098		0.82	2.11719	8.31179			-7644.84	7.64484		0.82	7.64484
	91.2194	3.32307		86.15	2.36342		0.84	2.22101	8.67184			-7614.27	7.61427		0.84	7.61427
	94.2923	3.36163		91.2433	2.405		0.86	2.32782	9.0407			-7584.55	7.58455		0.86	7.58455
				94.3051	2.44005		0.88	2.43768	9.41855			-7555.67	7.55567		0.88	7.55567
							0.9	2.55062	9.80555			-7527.58	7.52758		0.9	7.52758
							0.92	2.66672	10.2019			-7500.26	7.50026		0.92	7.50026
							0.94	2.78602	10.6077			-7473.67	7.47367		0.94	7.47367
							0.96	2.90859	11.0232			-7447.8	7.4478		0.96	7.4478
							0.98	3.03448	11.4487			-7422.61	7.42261		0.98	7.42261
							1	3.16376	11.8842			-7398.09	7.39809		1	7.39809
							1.02	3.2965	12.33			-7374.21	7.37421		1.02	7.37421
							1.04	3.43275	12.7863			-7350.96	7.35096		1.04	7.35096
							1.06	3.57259	13.2534			-7328.3	7.3283		1.06	7.3283
							1.08	3.71608	13.7314			-7306.24	7.30624		1.08	7.30624
							1.1	3.8633	14.2206			-7284.74	7.28474		1.1	7.28474
							1.12	4.01432	14.7212			-7263.8	7.2638		1.12	7.2638
							1.14	4.16922	15.2336			-7243.4	7.2434		1.14	7.2434
							1.16	4.32807	15.7579			-7223.53	7.22353		1.16	7.22353
							1.18	4.49095	16.2944			-7204.17	7.20417		1.18	7.20417
							1.2	4.65795	16.8434			-7185.31	7.18531		1.2	7.18531
							1.22	4.82916	17.4052			-7166.95	7.16695		1.22	7.16695
							1.24	5.00464	17.9801			-7149.06	7.14906		1.24	7.14906
							1.26	5.18451	18.5683			-7131.65	7.13165		1.26	7.13165
							1.28	5.36884	19.1703			-7114.7	7.1147		1.28	7.1147
							1.3	5.55773	19.7863			-7098.2	7.0982		1.3	7.0982
							1.32	5.75128	20.4166			-7082.15	7.08215		1.32	7.08215
							1.34	5.94959	21.0617			-7066.54	7.06654		1.34	7.06654
							1.36	6.15276	21.7219			-7051.36	7.05136		1.36	7.05136
							1.38	6.3609	22.3975			-7036.6	7.0366		1.38	7.0366
							1.4	6.57411	23.0889			-7022.26	7.02226		1.4	7.02226
							1.42	6.7925	23.7966			-7008.33	7.00833		1.42	7.00833
							1.44	7.0162	24.5209			-6994.81	6.99481		1.44	6.99481
							1.46	7.24531	25.2623			-6981.7	6.9817		1.46	6.9817
							1.48	7.47996	26.0212			-6968.98	6.96898		1.48	6.96898
							1.5	7.72027	26.7981			-6956.66	6.95666		1.5	6.95666
							1.52	7.96638	27.5934			-6944.74	6.94474		1.52	6.94474
							1.54	8.21841	28.4076			-6933.19	6.93319		1.54	6.93319
							1.56	8.47649	29.2413			-6922.04	6.92204		1.56	6.92204
							1.58	8.74078	30.095			-6911.27	6.91127		1.58	6.91127
							1.6	9.01141	30.9691			-6900.88	6.90088		1.6	6.90088
							1.62	9.28852	31.8644			-6890.86	6.89086		1.62	6.89086
							1.64	9.57228	32.7812			-6881.23	6.88123		1.64	6.88123
							1.66	9.86284	33.7204			-6871.97	6.87197		1.66	6.87197
							1.68	10.1604	34.6824			-6863.08	6.86308		1.68	6.86308
							1.7	10.465	35.668			-6854.57	6.85457		1.7	6.85457
							1.72	10.777	36.6778			-6846.44	6.84644		1.72	6.84644
							1.74	11.0964	37.7125			-6838.67	6.83867		1.74	6.83867
							1.76	11.4235	38.7729			-6831.29	6.83129		1.76	6.83129
							1.78	11.7584	39.8596			-6824.27	6.82427		1.78	6.82427
							1.8	12.1014	40.9735			-6817.63	6.81763		1.8	6.81763
							1.82	12.4526	42.1154			-6811.37	6.81137		1.82	6.81137
							1.84	12.8122	43.2862			-6805.49	6.80549		1.84	6.80549
							1.86	13.1805	44.4867			-6799.98	6.79998		1.86	6.79998
							1.88	13.5577	45.7178			-6794.86	6.79486		1.88	6.79486
							1.9	13.944	46.9805			-6790.11	6.79011		1.9	6.79011
							1.92	14.3396	48.2758			-6785.76	6.78576		1.92	6.78576
							1.94	14.7448	49.6046			-6781.79	6.78179		1.94	6.78179
							1.96	15.1598	50.9682			-6778.22	6.77822		1.96	6.77822
							1.98	15.5848	52.3675			-6775.04	6.77504		1.98	6.77504
							2	16.0203	53.8038			-6772.26	6.77226		2	6.77226
							2.02	16.4663	55.2783			-6769.88	6.76988		2.02	6.76988
							2.04	16.9232	56.7922			-6767.9	6.7679		2.04	6.7679
							2.06	17.3913	58.3468			-6766.34	6.76634		2.06	6.76634
							2.08	17.8709	59.9436			-6765.2	6.7652		2.08	6.7652
							2.1	18.3623	61.5839			-6764.48	6.76448		2.1	6.76448
							2.12	18.8658	63.2692			-6764.18	6.76418		2.12	6.76418
							2.14	19.3818	65.0012			-6764.32	6.76432		2.14	6.76432
							2.16	19.9106	66.7814			-6764.9	6.7649		2.16	6.7649
							2.18	20.4525	68.6116			-6765.92	6.76592		2.18	6.76592
							2.2	21.0079	70.4935			-6767.4	6.7674		2.2	6.7674
							2.22	21.5772	72.429			-6769.34	6.76934		2.22	6.76934
							2.24	22.1608	74.42			-6771.75	6.77175		2.24	6.77175
							2.26	22.7591	76.4687			-6774.63	6.77463		2.26	6.77463
							2.28	23.3726	78.5772			-6778	6.778		2.28	6.778
							2.3	24.0015	80.7476			-6781.87	6.78187		2.3	6.78187
							2.32	24.6465	82.9824			-6786.24	6.78624		2.32	6.78624
							2.34	25.308	85.2841			-6791.13	6.79113		2.34	6.79113
							2.36	25.9864	87.6551			-6796.54	6.79654		2.36	6.79654
							2.38	26.6823	90.0983			-6802.49	6.80249		2.38	6.80249
							2.4	27.3962	92.6166			-6808.99	6.80899		2.4	6.80899
							2.42	28.1287	95.2129			-6816.05	6.81605		2.42	6.81605
							2.44	28.8802	97.8903			-6823.69	6.82369		2.44	6.82369

## Sheet: HHU-1 DSFreundlich Langmuir fit
						G	H	I	J	K	L	M	N	O	P	Q	R	S	T	U	V	W
						Freundlich Langmuir fit from origin 77 K			a	4.20974	Freundlich Langmuir fit from origin 87 K		a	1.12041
									b	0.0369			b	0.15144
									c	0.71754			c	0.88883
									a1	1.35032			a1	3.6671
									b1	0.42861			b1	0.01378
									c1	0.82586			c1	0.84398
	H2		H2					77.15	87.15								77.15		p for all n's from column H at 77 K	87.15		p for all n's column H at 87 K
	77K		87 K			R [J/mol/K]	mmol/g	P kPa	P kPa		Hads [J/mol]	– Hads [KJ/mol]		mmol/g	– Hads [KJ/mol]		mmol/g	P kPa	P kPa	mmol/g	P kPa	P kPa
	kPa	mmol/g	kPa	mmol/g			0.01	0.00458	0.0297		-10450.3	10.4503		0.01	10.4503		0.00306456	0.00102	0.00458	0.000523036	0.00102	0.0297
	0.000439963	4.4615e-06	0.000333305	8.92299e-06			0.02	0.011	0.0658		-9999.01	9.99901		0.02	9.99901		0.00311168	0.00104	0.011	0.000532006	0.00104	0.0658
	0.0110524	0.0186134	0.000399966	1.33845e-05			0.03	0.0185	0.105		-9705.33	9.70533		0.03	9.70533		0.00315862	0.00106	0.0185	0.000540954	0.00106	0.105
	0.0135055	0.0185866	0.0035197	0.000575533			0.04	0.0267	0.146		-9497.13	9.49713		0.04	9.49713		0.00320536	0.00108	0.0267	0.000549881	0.00108	0.146
	0.0140121	0.0192692	0.00407965	0.000695994		8.314	0.05	0.0356	0.19		-9361.49	9.36149		0.05	9.36149		0.00325192	0.0011	0.0356	0.000558788	0.0011	0.19
	0.0141988	0.0195101	0.00590616	0.00110199			0.06	0.045	0.235		-9239.87	9.23987		0.06	9.23987		0.00329831	0.00112	0.045	0.000567675	0.00112	0.235
	0.0143321	0.0197243	0.00714606	0.00139645			0.07	0.0549	0.283		-9167.26	9.16726		0.07	9.16726		0.00334452	0.00114	0.0549	0.000576542	0.00114	0.283
	0.0143988	0.0198537	0.00802598	0.00160168			0.08	0.0653	0.331		-9073.31	9.07331		0.08	9.07331		0.00339056	0.00116	0.0653	0.00058539	0.00116	0.331
	0.0144788	0.0200321	0.00862593	0.00173998			0.09	0.0761	0.381		-9004.13	9.00413		0.09	9.00413		0.00343643	0.00118	0.0761	0.000594219	0.00118	0.381
	0.0204383	0.0274694	0.0109857	0.00222629			0.1	0.0874	0.433		-8945.39	8.94539		0.1	8.94539		0.00348213	0.0012	0.0874	0.000603029	0.0012	0.433
	0.0513823	0.0622825	0.027971	0.00683501			0.12	0.111	0.539		-8833.27	8.83327		0.12	8.83327		0.00352768	0.00122	0.111	0.000611821	0.00122	0.539
	0.066941	0.0779914	0.0455695	0.0115508			0.14	0.136	0.651		-8753.16	8.75316		0.14	8.75316		0.00357307	0.00124	0.136	0.000620595	0.00124	0.651
	0.0820197	0.0922236	0.0654078	0.0167574			0.16	0.163	0.768		-8664.75	8.66475		0.16	8.66475		0.0036183	0.00126	0.163	0.000629352	0.00126	0.768
	0.110111	0.117052	0.0928054	0.0237575			0.18	0.191	0.891		-8609.03	8.60903		0.18	8.60903		0.00366338	0.00128	0.191	0.000638092	0.00128	0.891
	0.267151	0.232212	0.102031	0.0259079			0.2	0.22	1.01		-8519.63	8.51963		0.2	8.51963		0.00370831	0.0013	0.22	0.000646814	0.0013	1.01
	0.524795	0.370915	0.260964	0.0632016			0.22	0.251	1.15		-8508.37	8.50837		0.22	8.50837		0.0037531	0.00132	0.251	0.00065552	0.00132	1.15
	0.719765	0.455479	0.511557	0.114616			0.24	0.284	1.28		-8416.56	8.41656		0.24	8.41656		0.00379774	0.00134	0.284	0.00066421	0.00134	1.28
	0.814451	0.491769	0.721245	0.152302			0.26	0.318	1.42		-8364.69	8.36469		0.26	8.36469		0.00384225	0.00136	0.318	0.000672883	0.00136	1.42
	0.915829	0.528571	0.82073	0.169974			0.28	0.353	1.57		-8342.34	8.34234		0.28	8.34234		0.00388661	0.00138	0.353	0.000681541	0.00138	1.57
	1.01893	0.563875	0.914109	0.184706			0.3	0.39	1.72		-8295.21	8.29521		0.3	8.29521		0.00393084	0.0014	0.39	0.000690183	0.0014	1.72
	2.05704	0.835906	1.01386	0.201526			0.34	0.468	2.05		-8257.17	8.25717		0.34	8.25717		0.00397494	0.00142	0.468	0.00069881	0.00142	2.05
	3.03745	1.0143	2.03032	0.339676			0.38	0.552	2.39		-8192.18	8.19218		0.38	8.19218		0.0040189	0.00144	0.552	0.000707421	0.00144	2.39
	4.08772	1.16446	3.13336	0.459623			0.42	0.643	2.76		-8143.77	8.14377		0.42	8.14377		0.00406274	0.00146	0.643	0.000716018	0.00146	2.76
	5.13663	1.28708	3.99406	0.538373			0.46	0.74	3.15		-8097.19	8.09719		0.46	8.09719		0.00410645	0.00148	0.74	0.0007246	0.00148	3.15
	5.99982	1.3738	5.00973	0.62162			0.5	0.844	3.56		-8046.07	8.04607		0.5	8.04607		0.00415003	0.0015	0.844	0.000733168	0.0015	3.56
	7.02002	1.46547	6.02454	0.695213			0.55	0.985	4.12		-7999.13	7.99913		0.55	7.99913		0.00419349	0.00152	0.985	0.000741722	0.00152	4.12
	8.04988	1.54679	7.07091	0.765584			0.6	1.13	4.73		-8003.27	8.00327		0.6	8.00327		0.00423684	0.00154	1.13	0.000750262	0.00154	4.73
	9.07335	1.62014	8.12059	0.823619			0.65	1.3	5.38		-7939.64	7.93964		0.65	7.93964		0.00428006	0.00156	1.3	0.000758788	0.00156	5.38
	10.0959	1.68744	9.12768	0.87962			0.7	1.48	6.08		-7898.49	7.89849		0.7	7.89849		0.00432316	0.00158	1.48	0.0007673	0.00158	6.08
	12.7616	1.8394	10.143	0.932689			0.75	1.68	6.84		-7848.35	7.84835		0.75	7.84835		0.00436615	0.0016	1.68	0.000775799	0.0016	6.84
	15.3102	1.96036	12.7777	1.05265			0.8	1.89	7.65		-7815.57	7.81557		0.8	7.81557		0.00440903	0.00162	1.89	0.000784285	0.00162	7.65
	17.8593	2.06494	15.1057	1.14474			0.85	2.12	8.53		-7782.28	7.78228		0.85	7.78228		0.0044518	0.00164	2.12	0.000792758	0.00164	8.53
	20.1902	2.15096	17.6556	1.23232			0.9	2.37	9.47		-7743.51	7.74351		0.9	7.74351		0.00449445	0.00166	2.37	0.000801218	0.00166	9.47
	25.3965	2.31678	20.2099	1.3134			0.95	2.63	10.48		-7728.12	7.72812		0.95	7.72812		0.004537	0.00168	2.63	0.000809666	0.00168	10.48
	30.495	2.45007	25.4612	1.45849			1	2.93	11.56		-7672.57	7.67257		1	7.67257		0.00457944	0.0017	2.93	0.000818101	0.0017	11.56
	35.5799	2.56696	30.5046	1.57718			1.05	3.24	12.71		-7640.53	7.64053		1.05	7.64053		0.00462177	0.00172	3.24	0.000826524	0.00172	12.71
	40.683	2.67205	35.3747	1.67958			1.1	3.58	13.95		-7603.08	7.60308		1.1	7.60308		0.00466401	0.00174	3.58	0.000834934	0.00174	13.95
	45.5375	2.75804	40.4518	1.77552			1.15	3.94	15.26		-7569.19	7.56919		1.15	7.56919		0.00470613	0.00176	3.94	0.000843333	0.00176	15.26
	50.5982	2.84059	45.5551	1.86315			1.2	4.34	16.67		-7522.69	7.52269		1.2	7.52269		0.00474816	0.00178	4.34	0.000851719	0.00178	16.67
	55.6719	2.91914	50.6139	1.94218			1.25	4.76	18.17		-7487.97	7.48797		1.25	7.48797		0.00479009	0.0018	4.76	0.000860094	0.0018	18.17
	60.7654	2.98933	55.6958	2.01275			1.3	5.22	19.76		-7441.22	7.44122		1.3	7.44122		0.00483192	0.00182	5.22	0.000868458	0.00182	19.76
	65.8605	3.05008	60.7852	2.07514			1.35	5.71	21.45		-7398.42	7.39842		1.35	7.39842		0.00487365	0.00184	5.71	0.00087681	0.00184	21.45
	70.9371	3.1053	65.8481	2.14072			1.4	6.24	23.25		-7352.69	7.35269		1.4	7.35269		0.00491529	0.00186	6.24	0.000885151	0.00186	23.25
	76.0137	3.16239	70.9482	2.19565			1.45	6.8	25.16		-7313.61	7.31361		1.45	7.31361		0.00495683	0.00188	6.8	0.00089348	0.00188	25.16
	81.0651	3.21805	76.0012	2.25075			1.5	7.41	27.18		-7265.07	7.26507		1.5	7.26507		0.00499828	0.0019	7.41	0.000901799	0.0019	27.18
	86.1494	3.27259	81.0549	2.31098			1.55	8.06	29.32		-7218.71	7.21871		1.55	7.21871		0.00503963	0.00192	8.06	0.000910107	0.00192	29.32
	91.2194	3.32307	86.15	2.36342			1.6	8.76	31.58		-7168.24	7.16824		1.6	7.16824		0.0050809	0.00194	8.76	0.000918404	0.00194	31.58
	94.2923	3.36163	91.2433	2.405			1.65	9.5	33.97		-7122.72	7.12272		1.65	7.12272		0.00512208	0.00196	9.5	0.00092669	0.00196	33.97
			94.3051	2.44005			1.7	10.3	36.5		-7072.32	7.07232		1.7	7.07232		0.00516316	0.00198	10.3	0.000934966	0.00198	36.5
							1.75	11.15	39.17		-7023.7	7.0237		1.75	7.0237		0.00520416	0.002	11.15	0.000943232	0.002	39.17
							1.8	12.06	41.98		-6972.43	6.97243		1.8	6.97243		0.00524508	0.00202	12.06	0.000951487	0.00202	41.98
							1.85	13.03	44.95		-6922.1	6.9221		1.85	6.9221		0.0052859	0.00204	13.03	0.000959732	0.00204	44.95
							1.9	14.05	48.09		-6878.25	6.87825		1.9	6.87825		0.00532665	0.00206	14.05	0.000967967	0.00206	48.09
							1.95	15.15	51.39		-6827.89	6.82789		1.95	6.82789		0.00536731	0.00208	15.15	0.000976192	0.00208	51.39
							2	16.31	54.87		-6781.75	6.78175		2	6.78175		0.00540789	0.0021	16.31	0.000984408	0.0021	54.87
							2.05	17.55	58.55		-6735.01	6.73501		2.05	6.73501		0.00544838	0.00212	17.55	0.000992613	0.00212	58.55
							2.1	18.86	62.42		-6690.37	6.69037		2.1	6.69037		0.0054888	0.00214	18.86	0.00100081	0.00214	62.42
							2.15	20.25	66.5		-6646.8	6.6468		2.15	6.6468		0.00552913	0.00216	20.25	0.001009	0.00216	66.5
							2.2	21.73	70.8		-6602.74	6.60274		2.2	6.60274		0.00556939	0.00218	21.73	0.00101717	0.00218	70.8
							2.25	23.3	75.33		-6559.47	6.55947		2.25	6.55947		0.00560957	0.0022	23.3	0.00102534	0.0022	75.33
							2.3	24.95	80.12		-6521.61	6.52161		2.3	6.52161		0.00564967	0.00222	24.95	0.0010335	0.00222	80.12
							2.35	26.71	85.17		-6482.25	6.48225		2.35	6.48225		0.00568969	0.00224	26.71	0.00104165	0.00224	85.17
							2.4	28.57	90.5		-6445.25	6.44525		2.4	6.44525		0.00572964	0.00226	28.57	0.00104979	0.00226	90.5
																	0.00576952	0.00228		0.00105792	0.00228
																	0.00580932	0.0023		0.00106604	0.0023
																	0.00584905	0.00232		0.00107416	0.00232
																	0.0058887	0.00234		0.00108226	0.00234
																	0.00592829	0.00236		0.00109036	0.00236
																	0.0059678	0.00238		0.00109845	0.00238
																	0.00600725	0.0024		0.00110653	0.0024
																	0.00604662	0.00242		0.0011146	0.00242
																	0.00608592	0.00244		0.00112266	0.00244
																	0.00612516	0.00246		0.00113072	0.00246
																	0.00616433	0.00248		0.00113876	0.00248
																	0.00620343	0.0025		0.0011468	0.0025
																	0.00624247	0.00252		0.00115483	0.00252
																	0.00628144	0.00254		0.00116285	0.00254
																	0.00632035	0.00256		0.00117087	0.00256
																	0.00635919	0.00258		0.00117888	0.00258
																	0.00639797	0.0026		0.00118688	0.0026
																	0.00643669	0.00262		0.00119487	0.00262
																	0.00647534	0.00264		0.00120285	0.00264
																	0.00651393	0.00266		0.00121083	0.00266
																	0.00655246	0.00268		0.0012188	0.00268
																	0.00659093	0.0027		0.00122676	0.0027
																	0.00662934	0.00272		0.00123471	0.00272
																	0.00666769	0.00274		0.00124266	0.00274
																	0.00670598	0.00276		0.0012506	0.00276
																	0.00674422	0.00278		0.00125853	0.00278
																	0.00678239	0.0028		0.00126646	0.0028
																	0.00682051	0.00282		0.00127438	0.00282
																	0.00685857	0.00284		0.00128229	0.00284
																	0.00689657	0.00286		0.00129019	0.00286
																	0.00693452	0.00288		0.00129809	0.00288
																	0.00697241	0.0029		0.00130598	0.0029
																	0.00701024	0.00292		0.00131387	0.00292
																	0.00704802	0.00294		0.00132174	0.00294
																	0.00708575	0.00296		0.00132962	0.00296
																	0.00712342	0.00298		0.00133748	0.00298
																	0.00716104	0.003		0.00134534	0.003
																	0.00719861	0.00302		0.00135319	0.00302
																	0.00723612	0.00304		0.00136103	0.00304
																	0.00727358	0.00306		0.00136887	0.00306
																	0.00731099	0.00308		0.0013767	0.00308
																	0.00734835	0.0031		0.00138453	0.0031
																	0.00738566	0.00312		0.00139235	0.00312
																	0.00742291	0.00314		0.00140016	0.00314
																	0.00746012	0.00316		0.00140797	0.00316
																	0.00749728	0.00318		0.00141577	0.00318
																	0.00753438	0.0032		0.00142356	0.0032
																	0.00757144	0.00322		0.00143135	0.00322
																	0.00760845	0.00324		0.00143914	0.00324
																	0.00764541	0.00326		0.00144691	0.00326
																	0.00768233	0.00328		0.00145468	0.00328
																	0.00771919	0.0033		0.00146245	0.0033
																	0.00775601	0.00332		0.00147021	0.00332
																	0.00779278	0.00334		0.00147796	0.00334
																	0.00782951	0.00336		0.00148571	0.00336
																	0.00786619	0.00338		0.00149345	0.00338
																	0.00790282	0.0034		0.00150118	0.0034
																	0.00793941	0.00342		0.00150891	0.00342
																	0.00797595	0.00344		0.00151664	0.00344
																	0.00801245	0.00346		0.00152436	0.00346
																	0.0080489	0.00348		0.00153207	0.00348
																	0.00808531	0.0035		0.00153978	0.0035
																	0.00812167	0.00352		0.00154748	0.00352
																	0.00815799	0.00354		0.00155518	0.00354
																	0.00819427	0.00356		0.00156287	0.00356
																	0.0082305	0.00358		0.00157056	0.00358
																	0.00826669	0.0036		0.00157824	0.0036
																	0.00830284	0.00362		0.00158591	0.00362
																	0.00833895	0.00364		0.00159358	0.00364
																	0.00837501	0.00366		0.00160125	0.00366
																	0.00841103	0.00368		0.00160891	0.00368
																	0.00844701	0.0037		0.00161656	0.0037
																	0.00848295	0.00372		0.00162421	0.00372
																	0.00851885	0.00374		0.00163186	0.00374
																	0.00855471	0.00376		0.0016395	0.00376
																	0.00859053	0.00378		0.00164713	0.00378
																	0.0086263	0.0038		0.00165476	0.0038
																	0.00866204	0.00382		0.00166238	0.00382
																	0.00869774	0.00384		0.00167	0.00384
																	0.0087334	0.00386		0.00167762	0.00386
																	0.00876902	0.00388		0.00168523	0.00388
																	0.0088046	0.0039		0.00169283	0.0039
																	0.00884014	0.00392		0.00170043	0.00392
																	0.00887564	0.00394		0.00170803	0.00394
																	0.00891111	0.00396		0.00171562	0.00396
																	0.00894654	0.00398		0.0017232	0.00398
																	0.00898192	0.004		0.00173078	0.004
																	0.00901728	0.00402		0.00173836	0.00402
																	0.00905259	0.00404		0.00174593	0.00404
																	0.00908787	0.00406		0.00175349	0.00406
																	0.00912311	0.00408		0.00176106	0.00408
																	0.00915831	0.0041		0.00176861	0.0041
																	0.00919348	0.00412		0.00177617	0.00412
																	0.00922861	0.00414		0.00178371	0.00414
																	0.00926371	0.00416		0.00179126	0.00416
																	0.00929877	0.00418		0.0017988	0.00418
																	0.00933379	0.0042		0.00180633	0.0042
																	0.00936878	0.00422		0.00181386	0.00422
																	0.00940374	0.00424		0.00182139	0.00424
																	0.00943866	0.00426		0.00182891	0.00426
																	0.00947354	0.00428		0.00183642	0.00428
																	0.00950839	0.0043		0.00184394	0.0043
																	0.00954321	0.00432		0.00185144	0.00432
																	0.00957799	0.00434		0.00185895	0.00434
																	0.00961273	0.00436		0.00186645	0.00436
																	0.00964745	0.00438		0.00187394	0.00438
																	0.00968213	0.0044		0.00188143	0.0044
																	0.00971677	0.00442		0.00188892	0.00442
																	0.00975138	0.00444		0.0018964	0.00444
																	0.00978596	0.00446		0.00190388	0.00446
																	0.00982051	0.00448		0.00191135	0.00448
																	0.00985503	0.0045		0.00191882	0.0045
																	0.00988951	0.00452		0.00192629	0.00452
																	0.00992396	0.00454		0.00193375	0.00454
																	0.00995837	0.00456		0.00194121	0.00456
																	0.00999276	0.00458		0.00194866	0.00458
																	0.0100271	0.0046		0.00195611	0.0046
																	0.0100614	0.00462		0.00196356	0.00462
																	0.0100957	0.00464		0.001971	0.00464
																	0.01013	0.00466		0.00197843	0.00466
																	0.0101642	0.00468		0.00198587	0.00468
																	0.0101984	0.0047		0.0019933	0.0047
																	0.0102326	0.00472		0.00200072	0.00472
																	0.0102667	0.00474		0.00200814	0.00474
																	0.0103008	0.00476		0.00201556	0.00476
																	0.0103349	0.00478		0.00202297	0.00478
																	0.0103689	0.0048		0.00203038	0.0048
																	0.0104029	0.00482		0.00203779	0.00482
																	0.0104369	0.00484		0.00204519	0.00484
																	0.0104709	0.00486		0.00205259	0.00486
																	0.0105048	0.00488		0.00205998	0.00488
																	0.0105387	0.0049		0.00206737	0.0049
																	0.0105726	0.00492		0.00207476	0.00492
																	0.0106064	0.00494		0.00208214	0.00494
																	0.0106402	0.00496		0.00208952	0.00496
																	0.010674	0.00498		0.0020969	0.00498
																	0.0107077	0.005		0.00210427	0.005
																	0.0107414	0.00502		0.00211164	0.00502
																	0.0107751	0.00504		0.002119	0.00504
																	0.0108088	0.00506		0.00212636	0.00506
																	0.0108424	0.00508		0.00213372	0.00508
																	0.010876	0.0051		0.00214107	0.0051
																	0.0109096	0.00512		0.00214843	0.00512
																	0.0109432	0.00514		0.00215577	0.00514
																	0.0109767	0.00516		0.00216311	0.00516
																	0.0110102	0.00518		0.00217045	0.00518
																	0.0110437	0.0052		0.00217779	0.0052
																	0.0110771	0.00522		0.00218512	0.00522
																	0.0111105	0.00524		0.00219245	0.00524
																	0.0111439	0.00526		0.00219978	0.00526
																	0.0111772	0.00528		0.0022071	0.00528
																	0.0112106	0.0053		0.00221442	0.0053
																	0.0112439	0.00532		0.00222173	0.00532
																	0.0112772	0.00534		0.00222904	0.00534
																	0.0113104	0.00536		0.00223635	0.00536
																	0.0113436	0.00538		0.00224366	0.00538
																	0.0113768	0.0054		0.00225096	0.0054
																	0.01141	0.00542		0.00225825	0.00542
																	0.0114432	0.00544		0.00226555	0.00544
																	0.0114763	0.00546		0.00227284	0.00546
																	0.0115094	0.00548		0.00228013	0.00548
																	0.0115424	0.0055		0.00228741	0.0055
																	0.0115755	0.00552		0.00229469	0.00552
																	0.0116085	0.00554		0.00230197	0.00554
																	0.0116415	0.00556		0.00230925	0.00556
																	0.0116745	0.00558		0.00231652	0.00558
																	0.0117074	0.0056		0.00232379	0.0056
																	0.0117403	0.00562		0.00233105	0.00562
																	0.0117732	0.00564		0.00233831	0.00564
																	0.0118061	0.00566		0.00234557	0.00566
																	0.0118389	0.00568		0.00235282	0.00568
																	0.0118718	0.0057		0.00236008	0.0057
																	0.0119045	0.00572		0.00236733	0.00572
																	0.0119373	0.00574		0.00237457	0.00574
																	0.0119701	0.00576		0.00238181	0.00576
																	0.0120028	0.00578		0.00238905	0.00578
																	0.0120355	0.0058		0.00239629	0.0058
																	0.0120681	0.00582		0.00240352	0.00582
																	0.0121008	0.00584		0.00241075	0.00584
																	0.0121334	0.00586		0.00241798	0.00586
																	0.012166	0.00588		0.0024252	0.00588
																	0.0121986	0.0059		0.00243242	0.0059
																	0.0122312	0.00592		0.00243964	0.00592
																	0.0122637	0.00594		0.00244686	0.00594
																	0.0122962	0.00596		0.00245407	0.00596
																	0.0123287	0.00598		0.00246128	0.00598
																	0.0123611	0.006		0.00246848	0.006
																	0.0123936	0.00602		0.00247568	0.00602
																	0.012426	0.00604		0.00248288	0.00604
																	0.0124584	0.00606		0.00249008	0.00606
																	0.0124908	0.00608		0.00249727	0.00608
																	0.0125231	0.0061		0.00250446	0.0061
																	0.0125554	0.00612		0.00251165	0.00612
																	0.0125877	0.00614		0.00251884	0.00614
																	0.01262	0.00616		0.00252602	0.00616
																	0.0126523	0.00618		0.0025332	0.00618
																	0.0126845	0.0062		0.00254037	0.0062
																	0.0127167	0.00622		0.00254755	0.00622
																	0.0127489	0.00624		0.00255472	0.00624
																	0.0127811	0.00626		0.00256188	0.00626
																	0.0128132	0.00628		0.00256905	0.00628
																	0.0128453	0.0063		0.00257621	0.0063
																	0.0128774	0.00632		0.00258337	0.00632
																	0.0129095	0.00634		0.00259052	0.00634
																	0.0129416	0.00636		0.00259768	0.00636
																	0.0129736	0.00638		0.00260483	0.00638
																	0.0130056	0.0064		0.00261197	0.0064
																	0.0130376	0.00642		0.00261912	0.00642
																	0.0130696	0.00644		0.00262626	0.00644
																	0.0131015	0.00646		0.0026334	0.00646
																	0.0131335	0.00648		0.00264054	0.00648
																	0.0131654	0.0065		0.00264767	0.0065
																	0.0131973	0.00652		0.0026548	0.00652
																	0.0132291	0.00654		0.00266193	0.00654
																	0.013261	0.00656		0.00266905	0.00656
																	0.0132928	0.00658		0.00267618	0.00658
																	0.0133246	0.0066		0.0026833	0.0066
																	0.0133564	0.00662		0.00269041	0.00662
																	0.0133882	0.00664		0.00269753	0.00664
																	0.0134199	0.00666		0.00270464	0.00666
																	0.0134516	0.00668		0.00271175	0.00668
																	0.0134833	0.0067		0.00271886	0.0067
																	0.013515	0.00672		0.00272596	0.00672
																	0.0135467	0.00674		0.00273306	0.00674
																	0.0135783	0.00676		0.00274016	0.00676
																	0.01361	0.00678		0.00274725	0.00678
																	0.0136416	0.0068		0.00275435	0.0068
																	0.0136731	0.00682		0.00276144	0.00682
																	0.0137047	0.00684		0.00276853	0.00684
																	0.0137362	0.00686		0.00277561	0.00686
																	0.0137678	0.00688		0.00278269	0.00688
																	0.0137993	0.0069		0.00278977	0.0069
																	0.0138308	0.00692		0.00279685	0.00692
																	0.0138622	0.00694		0.00280393	0.00694
																	0.0138937	0.00696		0.002811	0.00696
																	0.0139251	0.00698		0.00281807	0.00698
																	0.0139565	0.007		0.00282514	0.007
																	0.0139879	0.00702		0.0028322	0.00702
																	0.0140193	0.00704		0.00283927	0.00704
																	0.0140506	0.00706		0.00284632	0.00706
																	0.0140819	0.00708		0.00285338	0.00708
																	0.0141133	0.0071		0.00286044	0.0071
																	0.0141446	0.00712		0.00286749	0.00712
																	0.0141758	0.00714		0.00287454	0.00714
																	0.0142071	0.00716		0.00288159	0.00716
																	0.0142383	0.00718		0.00288863	0.00718
																	0.0142695	0.0072		0.00289567	0.0072
																	0.0143007	0.00722		0.00290271	0.00722
																	0.0143319	0.00724		0.00290975	0.00724
																	0.0143631	0.00726		0.00291679	0.00726
																	0.0143942	0.00728		0.00292382	0.00728
																	0.0144253	0.0073		0.00293085	0.0073
																	0.0144565	0.00732		0.00293788	0.00732
																	0.0144875	0.00734		0.0029449	0.00734
																	0.0145186	0.00736		0.00295193	0.00736
																	0.0145497	0.00738		0.00295895	0.00738
																	0.0145807	0.0074		0.00296597	0.0074
																	0.0146117	0.00742		0.00297298	0.00742
																	0.0146427	0.00744		0.00298	0.00744
																	0.0146737	0.00746		0.00298701	0.00746
																	0.0147047	0.00748		0.00299402	0.00748
																	0.0147356	0.0075		0.00300102	0.0075
																	0.0147665	0.00752		0.00300803	0.00752
																	0.0147975	0.00754		0.00301503	0.00754
																	0.0148283	0.00756		0.00302203	0.00756
																	0.0148592	0.00758		0.00302902	0.00758
																	0.0148901	0.0076		0.00303602	0.0076
																	0.0149209	0.00762		0.00304301	0.00762
																	0.0149517	0.00764		0.00305	0.00764
																	0.0149826	0.00766		0.00305699	0.00766
																	0.0150133	0.00768		0.00306398	0.00768
																	0.0150441	0.0077		0.00307096	0.0077
																	0.0150749	0.00772		0.00307794	0.00772
																	0.0151056	0.00774		0.00308492	0.00774
																	0.0151363	0.00776		0.00309189	0.00776
																	0.015167	0.00778		0.00309887	0.00778
																	0.0151977	0.0078		0.00310584	0.0078
																	0.0152284	0.00782		0.00311281	0.00782
																	0.015259	0.00784		0.00311978	0.00784
																	0.0152897	0.00786		0.00312674	0.00786
																	0.0153203	0.00788		0.00313371	0.00788
																	0.0153509	0.0079		0.00314067	0.0079
																	0.0153815	0.00792		0.00314763	0.00792
																	0.015412	0.00794		0.00315458	0.00794
																	0.0154426	0.00796		0.00316154	0.00796
																	0.0154731	0.00798		0.00316849	0.00798
																	0.0155037	0.008		0.00317544	0.008
																	0.0155342	0.00802		0.00318239	0.00802
																	0.0155646	0.00804		0.00318933	0.00804
																	0.0155951	0.00806		0.00319628	0.00806
																	0.0156256	0.00808		0.00320322	0.00808
																	0.015656	0.0081		0.00321016	0.0081
																	0.0156864	0.00812		0.00321709	0.00812
																	0.0157168	0.00814		0.00322403	0.00814
																	0.0157472	0.00816		0.00323096	0.00816
																	0.0157776	0.00818		0.00323789	0.00818
																	0.015808	0.0082		0.00324482	0.0082
																	0.0158383	0.00822		0.00325174	0.00822
																	0.0158686	0.00824		0.00325867	0.00824
																	0.0158989	0.00826		0.00326559	0.00826
																	0.0159292	0.00828		0.00327251	0.00828
																	0.0159595	0.0083		0.00327943	0.0083
																	0.0159898	0.00832		0.00328634	0.00832
																	0.01602	0.00834		0.00329326	0.00834
																	0.0160503	0.00836		0.00330017	0.00836
																	0.0160805	0.00838		0.00330708	0.00838
																	0.0161107	0.0084		0.00331398	0.0084
																	0.0161409	0.00842		0.00332089	0.00842
																	0.016171	0.00844		0.00332779	0.00844
																	0.0162012	0.00846		0.00333469	0.00846
																	0.0162313	0.00848		0.00334159	0.00848
																	0.0162614	0.0085		0.00334849	0.0085
																	0.0162916	0.00852		0.00335539	0.00852
																	0.0163216	0.00854		0.00336228	0.00854
																	0.0163517	0.00856		0.00336917	0.00856
																	0.0163818	0.00858		0.00337606	0.00858
																	0.0164118	0.0086		0.00338294	0.0086
																	0.0164419	0.00862		0.00338983	0.00862
																	0.0164719	0.00864		0.00339671	0.00864
																	0.0165019	0.00866		0.00340359	0.00866
																	0.0165319	0.00868		0.00341047	0.00868
																	0.0165619	0.0087		0.00341735	0.0087
																	0.0165918	0.00872		0.00342422	0.00872
																	0.0166218	0.00874		0.0034311	0.00874
																	0.0166517	0.00876		0.00343797	0.00876
																	0.0166816	0.00878		0.00344484	0.00878
																	0.0167115	0.0088		0.0034517	0.0088
																	0.0167414	0.00882		0.00345857	0.00882
																	0.0167713	0.00884		0.00346543	0.00884
																	0.0168011	0.00886		0.00347229	0.00886
																	0.016831	0.00888		0.00347915	0.00888
																	0.0168608	0.0089		0.00348601	0.0089
																	0.0168906	0.00892		0.00349286	0.00892
																	0.0169204	0.00894		0.00349972	0.00894
																	0.0169502	0.00896		0.00350657	0.00896
																	0.0169799	0.00898		0.00351342	0.00898
																	0.0170097	0.009		0.00352026	0.009
																	0.0170394	0.00902		0.00352711	0.00902
																	0.0170692	0.00904		0.00353395	0.00904
																	0.0170989	0.00906		0.0035408	0.00906
																	0.0171286	0.00908		0.00354764	0.00908
																	0.0171583	0.0091		0.00355447	0.0091
																	0.0171879	0.00912		0.00356131	0.00912
																	0.0172176	0.00914		0.00356814	0.00914
																	0.0172472	0.00916		0.00357498	0.00916
																	0.0172769	0.00918		0.00358181	0.00918
																	0.0173065	0.0092		0.00358864	0.0092
																	0.0173361	0.00922		0.00359546	0.00922
																	0.0173657	0.00924		0.00360229	0.00924
																	0.0173952	0.00926		0.00360911	0.00926
																	0.0174248	0.00928		0.00361593	0.00928
																	0.0174543	0.0093		0.00362275	0.0093
																	0.0174839	0.00932		0.00362957	0.00932
																	0.0175134	0.00934		0.00363638	0.00934
																	0.0175429	0.00936		0.0036432	0.00936
																	0.0175724	0.00938		0.00365001	0.00938
																	0.0176019	0.0094		0.00365682	0.0094
																	0.0176313	0.00942		0.00366363	0.00942
																	0.0176608	0.00944		0.00367043	0.00944
																	0.0176902	0.00946		0.00367724	0.00946
																	0.0177196	0.00948		0.00368404	0.00948
																	0.017749	0.0095		0.00369084	0.0095
																	0.0177784	0.00952		0.00369764	0.00952
																	0.0178078	0.00954		0.00370444	0.00954
																	0.0178372	0.00956		0.00371123	0.00956
																	0.0178665	0.00958		0.00371803	0.00958
																	0.0178959	0.0096		0.00372482	0.0096
																	0.0179252	0.00962		0.00373161	0.00962
																	0.0179545	0.00964		0.0037384	0.00964
																	0.0179838	0.00966		0.00374518	0.00966
																	0.0180131	0.00968		0.00375197	0.00968
																	0.0180424	0.0097		0.00375875	0.0097
																	0.0180717	0.00972		0.00376553	0.00972
																	0.0181009	0.00974		0.00377231	0.00974
																	0.0181302	0.00976		0.00377909	0.00976
																	0.0181594	0.00978		0.00378587	0.00978
																	0.0181886	0.0098		0.00379264	0.0098
																	0.0182178	0.00982		0.00379941	0.00982
																	0.018247	0.00984		0.00380618	0.00984
																	0.0182762	0.00986		0.00381295	0.00986
																	0.0183053	0.00988		0.00381972	0.00988
																	0.0183345	0.0099		0.00382649	0.0099
																	0.0183636	0.00992		0.00383325	0.00992
																	0.0183927	0.00994		0.00384001	0.00994
																	0.0184218	0.00996		0.00384677	0.00996
																	0.0184509	0.00998		0.00385353	0.00998
																	0.01848	0.01		0.00386029	0.01
																	0.0186253	0.0101		0.00389405	0.0101
																	0.0187702	0.0102		0.00392777	0.0102
																	0.0189148	0.0103		0.00396144	0.0103
																	0.0190591	0.0104		0.00399508	0.0104
																	0.0192031	0.0105		0.00402867	0.0105
																	0.0193468	0.0106		0.00406222	0.0106
																	0.0194903	0.0107		0.00409574	0.0107
																	0.0196334	0.0108		0.00412921	0.0108
																	0.0197763	0.0109		0.00416264	0.0109
																	0.0199188	0.011		0.00419604	0.011
																	0.0200611	0.0111		0.0042294	0.0111
																	0.0202031	0.0112		0.00426272	0.0112
																	0.0203448	0.0113		0.004296	0.0113
																	0.0204863	0.0114		0.00432924	0.0114
																	0.0206275	0.0115		0.00436245	0.0115
																	0.0207684	0.0116		0.00439562	0.0116
																	0.020909	0.0117		0.00442876	0.0117
																	0.0210494	0.0118		0.00446186	0.0118
																	0.0211896	0.0119		0.00449492	0.0119
																	0.0213294	0.012		0.00452795	0.012
																	0.0214691	0.0121		0.00456094	0.0121
																	0.0216084	0.0122		0.0045939	0.0122
																	0.0217476	0.0123		0.00462682	0.0123
																	0.0218865	0.0124		0.00465971	0.0124
																	0.0220251	0.0125		0.00469257	0.0125
																	0.0221635	0.0126		0.0047254	0.0126
																	0.0223016	0.0127		0.00475819	0.0127
																	0.0224395	0.0128		0.00479094	0.0128
																	0.0225772	0.0129		0.00482367	0.0129
																	0.0227147	0.013		0.00485636	0.013
																	0.0228519	0.0131		0.00488902	0.0131
																	0.0229889	0.0132		0.00492165	0.0132
																	0.0231256	0.0133		0.00495425	0.0133
																	0.0232622	0.0134		0.00498682	0.0134
																	0.0233985	0.0135		0.00501935	0.0135
																	0.0235346	0.0136		0.00505186	0.0136
																	0.0236704	0.0137		0.00508433	0.0137
																	0.0238061	0.0138		0.00511678	0.0138
																	0.0239415	0.0139		0.00514919	0.0139
																	0.0240768	0.014		0.00518158	0.014
																	0.0242118	0.0141		0.00521394	0.0141
																	0.0243466	0.0142		0.00524626	0.0142
																	0.0244812	0.0143		0.00527856	0.0143
																	0.0246156	0.0144		0.00531083	0.0144
																	0.0247497	0.0145		0.00534307	0.0145
																	0.0248837	0.0146		0.00537528	0.0146
																	0.0250175	0.0147		0.00540747	0.0147
																	0.0251511	0.0148		0.00543962	0.0148
																	0.0252845	0.0149		0.00547175	0.0149
																	0.0254176	0.015		0.00550385	0.015
																	0.0255506	0.0151		0.00553592	0.0151
																	0.0256834	0.0152		0.00556797	0.0152
																	0.025816	0.0153		0.00559999	0.0153
																	0.0259484	0.0154		0.00563198	0.0154
																	0.0260806	0.0155		0.00566395	0.0155
																	0.0262127	0.0156		0.00569589	0.0156
																	0.0263445	0.0157		0.0057278	0.0157
																	0.0264762	0.0158		0.00575969	0.0158
																	0.0266077	0.0159		0.00579155	0.0159
																	0.026739	0.016		0.00582339	0.016
																	0.0268701	0.0161		0.0058552	0.0161
																	0.027001	0.0162		0.00588699	0.0162
																	0.0271318	0.0163		0.00591875	0.0163
																	0.0272623	0.0164		0.00595048	0.0164
																	0.0273927	0.0165		0.0059822	0.0165
																	0.027523	0.0166		0.00601388	0.0166
																	0.027653	0.0167		0.00604554	0.0167
																	0.0277829	0.0168		0.00607718	0.0168
																	0.0279126	0.0169		0.0061088	0.0169
																	0.0280421	0.017		0.00614039	0.017
																	0.0281715	0.0171		0.00617195	0.0171
																	0.0283007	0.0172		0.00620349	0.0172
																	0.0284297	0.0173		0.00623501	0.0173
																	0.0285586	0.0174		0.00626651	0.0174
																	0.0286873	0.0175		0.00629798	0.0175
																	0.0288158	0.0176		0.00632943	0.0176
																	0.0289442	0.0177		0.00636086	0.0177
																	0.0290724	0.0178		0.00639226	0.0178
																	0.0292005	0.0179		0.00642364	0.0179
																	0.0293284	0.018		0.006455	0.018
																	0.0294561	0.0181		0.00648633	0.0181
																	0.0295837	0.0182		0.00651765	0.0182
																	0.0297111	0.0183		0.00654894	0.0183
																	0.0298384	0.0184		0.00658021	0.0184
																	0.0299655	0.0185		0.00661146	0.0185
																	0.0300925	0.0186		0.00664268	0.0186
																	0.0302193	0.0187		0.00667389	0.0187
																	0.030346	0.0188		0.00670507	0.0188
																	0.0304725	0.0189		0.00673623	0.0189
																	0.0305988	0.019		0.00676737	0.019
																	0.0307251	0.0191		0.00679849	0.0191
																	0.0308511	0.0192		0.00682959	0.0192
																	0.030977	0.0193		0.00686067	0.0193
																	0.0311028	0.0194		0.00689173	0.0194
																	0.0312284	0.0195		0.00692276	0.0195
																	0.0313539	0.0196		0.00695378	0.0196
																	0.0314793	0.0197		0.00698477	0.0197
																	0.0316045	0.0198		0.00701575	0.0198
																	0.0317295	0.0199		0.0070467	0.0199
																	0.0318544	0.02		0.00707764	0.02
																	0.0319792	0.0201		0.00710856	0.0201
																	0.0321038	0.0202		0.00713945	0.0202
																	0.0322283	0.0203		0.00717033	0.0203
																	0.0323527	0.0204		0.00720118	0.0204
																	0.0324769	0.0205		0.00723202	0.0205
																	0.032601	0.0206		0.00726284	0.0206
																	0.032725	0.0207		0.00729363	0.0207
																	0.0328488	0.0208		0.00732441	0.0208
																	0.0329725	0.0209		0.00735517	0.0209
																	0.033096	0.021		0.00738591	0.021
																	0.0332194	0.0211		0.00741663	0.0211
																	0.0333427	0.0212		0.00744734	0.0212
																	0.0334659	0.0213		0.00747802	0.0213
																	0.0335889	0.0214		0.00750868	0.0214
																	0.0337118	0.0215		0.00753933	0.0215
																	0.0338346	0.0216		0.00756996	0.0216
																	0.0339572	0.0217		0.00760057	0.0217
																	0.0340797	0.0218		0.00763116	0.0218
																	0.0342021	0.0219		0.00766174	0.0219
																	0.0343244	0.022		0.00769229	0.022
																	0.0344465	0.0221		0.00772283	0.0221
																	0.0345685	0.0222		0.00775335	0.0222
																	0.0346904	0.0223		0.00778385	0.0223
																	0.0348122	0.0224		0.00781433	0.0224
																	0.0349338	0.0225		0.0078448	0.0225
																	0.0350553	0.0226		0.00787525	0.0226
																	0.0351767	0.0227		0.00790568	0.0227
																	0.035298	0.0228		0.0079361	0.0228
																	0.0354192	0.0229		0.00796649	0.0229
																	0.0355402	0.023		0.00799687	0.023
																	0.0356611	0.0231		0.00802723	0.0231
																	0.0357819	0.0232		0.00805758	0.0232
																	0.0359026	0.0233		0.00808791	0.0233
																	0.0360231	0.0234		0.00811822	0.0234
																	0.0361436	0.0235		0.00814852	0.0235
																	0.0362639	0.0236		0.00817879	0.0236
																	0.0363841	0.0237		0.00820905	0.0237
																	0.0365042	0.0238		0.0082393	0.0238
																	0.0366242	0.0239		0.00826953	0.0239
																	0.0367441	0.024		0.00829974	0.024
																	0.0368638	0.0241		0.00832994	0.0241
																	0.0369835	0.0242		0.00836011	0.0242
																	0.037103	0.0243		0.00839028	0.0243
																	0.0372224	0.0244		0.00842042	0.0244
																	0.0373417	0.0245		0.00845056	0.0245
																	0.0374609	0.0246		0.00848067	0.0246
																	0.03758	0.0247		0.00851077	0.0247
																	0.037699	0.0248		0.00854085	0.0248
																	0.0378179	0.0249		0.00857092	0.0249
																	0.0379366	0.025		0.00860097	0.025
																	0.0380553	0.0251		0.00863101	0.0251
																	0.0381738	0.0252		0.00866103	0.0252
																	0.0382922	0.0253		0.00869103	0.0253
																	0.0384106	0.0254		0.00872102	0.0254
																	0.0385288	0.0255		0.00875099	0.0255
																	0.0386469	0.0256		0.00878095	0.0256
																	0.0387649	0.0257		0.0088109	0.0257
																	0.0388828	0.0258		0.00884082	0.0258
																	0.0390006	0.0259		0.00887074	0.0259
																	0.0391183	0.026		0.00890063	0.026
																	0.0392359	0.0261		0.00893052	0.0261
																	0.0393534	0.0262		0.00896039	0.0262
																	0.0394708	0.0263		0.00899024	0.0263
																	0.0395881	0.0264		0.00902008	0.0264
																	0.0397053	0.0265		0.0090499	0.0265
																	0.0398223	0.0266		0.00907971	0.0266
																	0.0399393	0.0267		0.0091095	0.0267
																	0.0400562	0.0268		0.00913928	0.0268
																	0.040173	0.0269		0.00916905	0.0269
																	0.0402897	0.027		0.0091988	0.027
																	0.0404063	0.0271		0.00922853	0.0271
																	0.0405227	0.0272		0.00925826	0.0272
																	0.0406391	0.0273		0.00928796	0.0273
																	0.0407554	0.0274		0.00931766	0.0274
																	0.0408716	0.0275		0.00934734	0.0275
																	0.0409877	0.0276		0.009377	0.0276
																	0.0411037	0.0277		0.00940665	0.0277
																	0.0412196	0.0278		0.00943629	0.0278
																	0.0413354	0.0279		0.00946591	0.0279
																	0.0414511	0.028		0.00949552	0.028
																	0.0415667	0.0281		0.00952512	0.0281
																	0.0416822	0.0282		0.0095547	0.0282
																	0.0417977	0.0283		0.00958426	0.0283
																	0.041913	0.0284		0.00961382	0.0284
																	0.0420282	0.0285		0.00964336	0.0285
																	0.0421434	0.0286		0.00967288	0.0286
																	0.0422584	0.0287		0.0097024	0.0287
																	0.0423734	0.0288		0.0097319	0.0288
																	0.0424882	0.0289		0.00976138	0.0289
																	0.042603	0.029		0.00979086	0.029
																	0.0427177	0.0291		0.00982032	0.0291
																	0.0428323	0.0292		0.00984976	0.0292
																	0.0429468	0.0293		0.00987919	0.0293
																	0.0430612	0.0294		0.00990861	0.0294
																	0.0431755	0.0295		0.00993802	0.0295
																	0.0432898	0.0296		0.00996741	0.0296
																	0.0434039	0.0297		0.00999679	0.0297
																	0.0435179	0.0298		0.0100262	0.0298
																	0.0436319	0.0299		0.0100555	0.0299
																	0.0437458	0.03		0.0100849	0.03
																	0.0438596	0.0301		0.0101142	0.0301
																	0.0439733	0.0302		0.0101435	0.0302
																	0.0440869	0.0303		0.0101728	0.0303
																	0.0442004	0.0304		0.0102021	0.0304
																	0.0443138	0.0305		0.0102314	0.0305
																	0.0444272	0.0306		0.0102606	0.0306
																	0.0445405	0.0307		0.0102899	0.0307
																	0.0446536	0.0308		0.0103191	0.0308
																	0.0447667	0.0309		0.0103484	0.0309
																	0.0448798	0.031		0.0103776	0.031
																	0.0449927	0.0311		0.0104068	0.0311
																	0.0451055	0.0312		0.010436	0.0312
																	0.0452183	0.0313		0.0104651	0.0313
																	0.0453309	0.0314		0.0104943	0.0314
																	0.0454435	0.0315		0.0105235	0.0315
																	0.045556	0.0316		0.0105526	0.0316
																	0.0456685	0.0317		0.0105817	0.0317
																	0.0457808	0.0318		0.0106108	0.0318
																	0.0458931	0.0319		0.0106399	0.0319
																	0.0460052	0.032		0.010669	0.032
																	0.0461173	0.0321		0.0106981	0.0321
																	0.0462294	0.0322		0.0107272	0.0322
																	0.0463413	0.0323		0.0107562	0.0323
																	0.0464531	0.0324		0.0107853	0.0324
																	0.0465649	0.0325		0.0108143	0.0325
																	0.0466766	0.0326		0.0108433	0.0326
																	0.0467882	0.0327		0.0108724	0.0327
																	0.0468997	0.0328		0.0109014	0.0328
																	0.0470112	0.0329		0.0109303	0.0329
																	0.0471226	0.033		0.0109593	0.033
																	0.0472338	0.0331		0.0109883	0.0331
																	0.0473451	0.0332		0.0110172	0.0332
																	0.0474562	0.0333		0.0110462	0.0333
																	0.0475673	0.0334		0.0110751	0.0334
																	0.0476782	0.0335		0.011104	0.0335
																	0.0477891	0.0336		0.0111329	0.0336
																	0.0479	0.0337		0.0111618	0.0337
																	0.0480107	0.0338		0.0111907	0.0338
																	0.0481214	0.0339		0.0112196	0.0339
																	0.048232	0.034		0.0112484	0.034
																	0.0483425	0.0341		0.0112773	0.0341
																	0.0484529	0.0342		0.0113061	0.0342
																	0.0485633	0.0343		0.0113349	0.0343
																	0.0486736	0.0344		0.0113637	0.0344
																	0.0487838	0.0345		0.0113925	0.0345
																	0.0488939	0.0346		0.0114213	0.0346
																	0.049004	0.0347		0.0114501	0.0347
																	0.049114	0.0348		0.0114789	0.0348
																	0.0492239	0.0349		0.0115077	0.0349
																	0.0493338	0.035		0.0115364	0.035
																	0.0494435	0.0351		0.0115651	0.0351
																	0.0495532	0.0352		0.0115939	0.0352
																	0.0496628	0.0353		0.0116226	0.0353
																	0.0497724	0.0354		0.0116513	0.0354
																	0.0498819	0.0355		0.01168	0.0355
																	0.0499913	0.0356		0.0117087	0.0356
																	0.0501006	0.0357		0.0117373	0.0357
																	0.0502098	0.0358		0.011766	0.0358
																	0.050319	0.0359		0.0117947	0.0359
																	0.0504281	0.036		0.0118233	0.036
																	0.0505372	0.0361		0.0118519	0.0361
																	0.0506461	0.0362		0.0118805	0.0362
																	0.050755	0.0363		0.0119092	0.0363
																	0.0508639	0.0364		0.0119378	0.0364
																	0.0509726	0.0365		0.0119663	0.0365
																	0.0510813	0.0366		0.0119949	0.0366
																	0.0511899	0.0367		0.0120235	0.0367
																	0.0512985	0.0368		0.012052	0.0368
																	0.051407	0.0369		0.0120806	0.0369
																	0.0515154	0.037		0.0121091	0.037
																	0.0516237	0.0371		0.0121376	0.0371
																	0.051732	0.0372		0.0121662	0.0372
																	0.0518402	0.0373		0.0121947	0.0373
																	0.0519483	0.0374		0.0122232	0.0374
																	0.0520564	0.0375		0.0122517	0.0375
																	0.0521644	0.0376		0.0122801	0.0376
																	0.0522723	0.0377		0.0123086	0.0377
																	0.0523801	0.0378		0.012337	0.0378
																	0.0524879	0.0379		0.0123655	0.0379
																	0.0525956	0.038		0.0123939	0.038
																	0.0527033	0.0381		0.0124224	0.0381
																	0.0528109	0.0382		0.0124508	0.0382
																	0.0529184	0.0383		0.0124792	0.0383
																	0.0530259	0.0384		0.0125076	0.0384
																	0.0531333	0.0385		0.012536	0.0385
																	0.0532406	0.0386		0.0125643	0.0386
																	0.0533478	0.0387		0.0125927	0.0387
																	0.053455	0.0388		0.012621	0.0388
																	0.0535621	0.0389		0.0126494	0.0389
																	0.0536692	0.039		0.0126777	0.039
																	0.0537762	0.0391		0.0127061	0.0391
																	0.0538831	0.0392		0.0127344	0.0392
																	0.05399	0.0393		0.0127627	0.0393
																	0.0540968	0.0394		0.012791	0.0394
																	0.0542035	0.0395		0.0128193	0.0395
																	0.0543102	0.0396		0.0128475	0.0396
																	0.0544168	0.0397		0.0128758	0.0397
																	0.0545233	0.0398		0.0129041	0.0398
																	0.0546298	0.0399		0.0129323	0.0399
																	0.0547362	0.04		0.0129606	0.04
																	0.0548425	0.0401		0.0129888	0.0401
																	0.0549488	0.0402		0.013017	0.0402
																	0.055055	0.0403		0.0130452	0.0403
																	0.0551612	0.0404		0.0130734	0.0404
																	0.0552673	0.0405		0.0131016	0.0405
																	0.0553733	0.0406		0.0131298	0.0406
																	0.0554793	0.0407		0.013158	0.0407
																	0.0555852	0.0408		0.0131861	0.0408
																	0.0556911	0.0409		0.0132143	0.0409
																	0.0557968	0.041		0.0132424	0.041
																	0.0559026	0.0411		0.0132706	0.0411
																	0.0560082	0.0412		0.0132987	0.0412
																	0.0561138	0.0413		0.0133268	0.0413
																	0.0562193	0.0414		0.0133549	0.0414
																	0.0563248	0.0415		0.013383	0.0415
																	0.0564302	0.0416		0.0134111	0.0416
																	0.0565356	0.0417		0.0134392	0.0417
																	0.0566409	0.0418		0.0134673	0.0418
																	0.0567461	0.0419		0.0134953	0.0419
																	0.0568513	0.042		0.0135234	0.042
																	0.0569564	0.0421		0.0135514	0.0421
																	0.0570614	0.0422		0.0135795	0.0422
																	0.0571664	0.0423		0.0136075	0.0423
																	0.0572714	0.0424		0.0136355	0.0424
																	0.0573762	0.0425		0.0136635	0.0425
																	0.0574811	0.0426		0.0136915	0.0426
																	0.0575858	0.0427		0.0137195	0.0427
																	0.0576905	0.0428		0.0137475	0.0428
																	0.0577951	0.0429		0.0137755	0.0429
																	0.0578997	0.043		0.0138035	0.043
																	0.0580042	0.0431		0.0138314	0.0431
																	0.0581087	0.0432		0.0138594	0.0432
																	0.0582131	0.0433		0.0138873	0.0433
																	0.0583174	0.0434		0.0139152	0.0434
																	0.0584217	0.0435		0.0139432	0.0435
																	0.0585259	0.0436		0.0139711	0.0436
																	0.0586301	0.0437		0.013999	0.0437
																	0.0587342	0.0438		0.0140269	0.0438
																	0.0588383	0.0439		0.0140548	0.0439
																	0.0589423	0.044		0.0140826	0.044
																	0.0590462	0.0441		0.0141105	0.0441
																	0.0591501	0.0442		0.0141384	0.0442
																	0.0592539	0.0443		0.0141662	0.0443
																	0.0593577	0.0444		0.0141941	0.0444
																	0.0594614	0.0445		0.0142219	0.0445
																	0.0595651	0.0446		0.0142497	0.0446
																	0.0596687	0.0447		0.0142776	0.0447
																	0.0597722	0.0448		0.0143054	0.0448
																	0.0598757	0.0449		0.0143332	0.0449
																	0.0599791	0.045		0.014361	0.045
																	0.0600825	0.0451		0.0143887	0.0451
																	0.0601858	0.0452		0.0144165	0.0452
																	0.0602891	0.0453		0.0144443	0.0453
																	0.0603923	0.0454		0.0144721	0.0454
																	0.0604954	0.0455		0.0144998	0.0455
																	0.0605985	0.0456		0.0145276	0.0456
																	0.0607016	0.0457		0.0145553	0.0457
																	0.0608046	0.0458		0.014583	0.0458
																	0.0609075	0.0459		0.0146107	0.0459
																	0.0610104	0.046		0.0146384	0.046
																	0.0611132	0.0461		0.0146662	0.0461
																	0.061216	0.0462		0.0146938	0.0462
																	0.0613187	0.0463		0.0147215	0.0463
																	0.0614213	0.0464		0.0147492	0.0464
																	0.061524	0.0465		0.0147769	0.0465
																	0.0616265	0.0466		0.0148045	0.0466
																	0.061729	0.0467		0.0148322	0.0467
																	0.0618315	0.0468		0.0148598	0.0468
																	0.0619338	0.0469		0.0148875	0.0469
																	0.0620362	0.047		0.0149151	0.047
																	0.0621385	0.0471		0.0149427	0.0471
																	0.0622407	0.0472		0.0149704	0.0472
																	0.0623429	0.0473		0.014998	0.0473
																	0.062445	0.0474		0.0150256	0.0474
																	0.0625471	0.0475		0.0150532	0.0475
																	0.0626491	0.0476		0.0150807	0.0476
																	0.0627511	0.0477		0.0151083	0.0477
																	0.062853	0.0478		0.0151359	0.0478
																	0.0629549	0.0479		0.0151634	0.0479
																	0.0630567	0.048		0.015191	0.048
																	0.0631585	0.0481		0.0152185	0.0481
																	0.0632602	0.0482		0.0152461	0.0482
																	0.0633618	0.0483		0.0152736	0.0483
																	0.0634634	0.0484		0.0153011	0.0484
																	0.063565	0.0485		0.0153286	0.0485
																	0.0636665	0.0486		0.0153561	0.0486
																	0.0637679	0.0487		0.0153836	0.0487
																	0.0638693	0.0488		0.0154111	0.0488
																	0.0639707	0.0489		0.0154386	0.0489
																	0.064072	0.049		0.0154661	0.049
																	0.0641732	0.0491		0.0154935	0.0491
																	0.0642744	0.0492		0.015521	0.0492
																	0.0643756	0.0493		0.0155485	0.0493
																	0.0644767	0.0494		0.0155759	0.0494
																	0.0645777	0.0495		0.0156033	0.0495
																	0.0646787	0.0496		0.0156308	0.0496
																	0.0647797	0.0497		0.0156582	0.0497
																	0.0648806	0.0498		0.0156856	0.0498
																	0.0649814	0.0499		0.015713	0.0499
																	0.0650822	0.05		0.0157404	0.05
																	0.065183	0.0501		0.0157678	0.0501
																	0.0652837	0.0502		0.0157952	0.0502
																	0.0653843	0.0503		0.0158226	0.0503
																	0.0654849	0.0504		0.0158499	0.0504
																	0.0655855	0.0505		0.0158773	0.0505
																	0.065686	0.0506		0.0159046	0.0506
																	0.0657864	0.0507		0.015932	0.0507
																	0.0658868	0.0508		0.0159593	0.0508
																	0.0659872	0.0509		0.0159867	0.0509
																	0.0660875	0.051		0.016014	0.051
																	0.0661878	0.0511		0.0160413	0.0511
																	0.066288	0.0512		0.0160686	0.0512
																	0.0663881	0.0513		0.0160959	0.0513
																	0.0664882	0.0514		0.0161232	0.0514
																	0.0665883	0.0515		0.0161505	0.0515
																	0.0666883	0.0516		0.0161778	0.0516
																	0.0667883	0.0517		0.016205	0.0517
																	0.0668882	0.0518		0.0162323	0.0518
																	0.0669881	0.0519		0.0162596	0.0519
																	0.0670879	0.052		0.0162868	0.052
																	0.0671877	0.0521		0.0163141	0.0521
																	0.0672874	0.0522		0.0163413	0.0522
																	0.0673871	0.0523		0.0163685	0.0523
																	0.0674867	0.0524		0.0163958	0.0524
																	0.0675863	0.0525		0.016423	0.0525
																	0.0676859	0.0526		0.0164502	0.0526
																	0.0677854	0.0527		0.0164774	0.0527
																	0.0678848	0.0528		0.0165046	0.0528
																	0.0679842	0.0529		0.0165318	0.0529
																	0.0680836	0.053		0.0165589	0.053
																	0.0681829	0.0531		0.0165861	0.0531
																	0.0682821	0.0532		0.0166133	0.0532
																	0.0683814	0.0533		0.0166404	0.0533
																	0.0684805	0.0534		0.0166676	0.0534
																	0.0685797	0.0535		0.0166947	0.0535
																	0.0686787	0.0536		0.0167219	0.0536
																	0.0687778	0.0537		0.016749	0.0537
																	0.0688767	0.0538		0.0167761	0.0538
																	0.0689757	0.0539		0.0168032	0.0539
																	0.0690746	0.054		0.0168304	0.054
																	0.0691734	0.0541		0.0168575	0.0541
																	0.0692722	0.0542		0.0168846	0.0542
																	0.069371	0.0543		0.0169116	0.0543
																	0.0694697	0.0544		0.0169387	0.0544
																	0.0695684	0.0545		0.0169658	0.0545
																	0.069667	0.0546		0.0169929	0.0546
																	0.0697656	0.0547		0.0170199	0.0547
																	0.0698641	0.0548		0.017047	0.0548
																	0.0699626	0.0549		0.017074	0.0549
																	0.070061	0.055		0.0171011	0.055
																	0.0701594	0.0551		0.0171281	0.0551
																	0.0702578	0.0552		0.0171551	0.0552
																	0.0703561	0.0553		0.0171822	0.0553
																	0.0704543	0.0554		0.0172092	0.0554
																	0.0705526	0.0555		0.0172362	0.0555
																	0.0706507	0.0556		0.0172632	0.0556
																	0.0707489	0.0557		0.0172902	0.0557
																	0.070847	0.0558		0.0173172	0.0558
																	0.070945	0.0559		0.0173442	0.0559
																	0.071043	0.056		0.0173711	0.056
																	0.071141	0.0561		0.0173981	0.0561
																	0.0712389	0.0562		0.0174251	0.0562
																	0.0713367	0.0563		0.017452	0.0563
																	0.0714346	0.0564		0.017479	0.0564
																	0.0715323	0.0565		0.0175059	0.0565
																	0.0716301	0.0566		0.0175328	0.0566
																	0.0717278	0.0567		0.0175598	0.0567
																	0.0718254	0.0568		0.0175867	0.0568
																	0.071923	0.0569		0.0176136	0.0569
																	0.0720206	0.057		0.0176405	0.057
																	0.0721181	0.0571		0.0176674	0.0571
																	0.0722156	0.0572		0.0176943	0.0572
																	0.072313	0.0573		0.0177212	0.0573
																	0.0724104	0.0574		0.0177481	0.0574
																	0.0725078	0.0575		0.017775	0.0575
																	0.0726051	0.0576		0.0178018	0.0576
																	0.0727024	0.0577		0.0178287	0.0577
																	0.0727996	0.0578		0.0178555	0.0578
																	0.0728968	0.0579		0.0178824	0.0579
																	0.0729939	0.058		0.0179092	0.058
																	0.073091	0.0581		0.0179361	0.0581
																	0.0731881	0.0582		0.0179629	0.0582
																	0.0732851	0.0583		0.0179897	0.0583
																	0.073382	0.0584		0.0180165	0.0584
																	0.073479	0.0585		0.0180434	0.0585
																	0.0735759	0.0586		0.0180702	0.0586
																	0.0736727	0.0587		0.018097	0.0587
																	0.0737695	0.0588		0.0181238	0.0588
																	0.0738663	0.0589		0.0181505	0.0589
																	0.073963	0.059		0.0181773	0.059
																	0.0740597	0.0591		0.0182041	0.0591
																	0.0741563	0.0592		0.0182309	0.0592
																	0.0742529	0.0593		0.0182576	0.0593
																	0.0743495	0.0594		0.0182844	0.0594
																	0.074446	0.0595		0.0183111	0.0595
																	0.0745425	0.0596		0.0183379	0.0596
																	0.0746389	0.0597		0.0183646	0.0597
																	0.0747353	0.0598		0.0183913	0.0598
																	0.0748316	0.0599		0.0184181	0.0599
																	0.0749279	0.06		0.0184448	0.06
																	0.0750242	0.0601		0.0184715	0.0601
																	0.0751204	0.0602		0.0184982	0.0602
																	0.0752166	0.0603		0.0185249	0.0603
																	0.0753128	0.0604		0.0185516	0.0604
																	0.0754089	0.0605		0.0185783	0.0605
																	0.075505	0.0606		0.018605	0.0606
																	0.075601	0.0607		0.0186316	0.0607
																	0.075697	0.0608		0.0186583	0.0608
																	0.0757929	0.0609		0.018685	0.0609
																	0.0758888	0.061		0.0187116	0.061
																	0.0759847	0.0611		0.0187383	0.0611
																	0.0760805	0.0612		0.0187649	0.0612
																	0.0761763	0.0613		0.0187915	0.0613
																	0.0762721	0.0614		0.0188182	0.0614
																	0.0763678	0.0615		0.0188448	0.0615
																	0.0764634	0.0616		0.0188714	0.0616
																	0.0765591	0.0617		0.018898	0.0617
																	0.0766547	0.0618		0.0189246	0.0618
																	0.0767502	0.0619		0.0189512	0.0619
																	0.0768457	0.062		0.0189778	0.062
																	0.0769412	0.0621		0.0190044	0.0621
																	0.0770366	0.0622		0.019031	0.0622
																	0.077132	0.0623		0.0190576	0.0623
																	0.0772274	0.0624		0.0190842	0.0624
																	0.0773227	0.0625		0.0191107	0.0625
																	0.077418	0.0626		0.0191373	0.0626
																	0.0775132	0.0627		0.0191638	0.0627
																	0.0776084	0.0628		0.0191904	0.0628
																	0.0777036	0.0629		0.0192169	0.0629
																	0.0777987	0.063		0.0192435	0.063
																	0.0778938	0.0631		0.01927	0.0631
																	0.0779888	0.0632		0.0192965	0.0632
																	0.0780839	0.0633		0.019323	0.0633
																	0.0781788	0.0634		0.0193496	0.0634
																	0.0782738	0.0635		0.0193761	0.0635
																	0.0783686	0.0636		0.0194026	0.0636
																	0.0784635	0.0637		0.0194291	0.0637
																	0.0785583	0.0638		0.0194555	0.0638
																	0.0786531	0.0639		0.019482	0.0639
																	0.0787478	0.064		0.0195085	0.064
																	0.0788425	0.0641		0.019535	0.0641
																	0.0789372	0.0642		0.0195614	0.0642
																	0.0790318	0.0643		0.0195879	0.0643
																	0.0791264	0.0644		0.0196144	0.0644
																	0.079221	0.0645		0.0196408	0.0645
																	0.0793155	0.0646		0.0196672	0.0646
																	0.07941	0.0647		0.0196937	0.0647
																	0.0795044	0.0648		0.0197201	0.0648
																	0.0795988	0.0649		0.0197465	0.0649
																	0.0796932	0.065		0.019773	0.065
																	0.0797875	0.0651		0.0197994	0.0651
																	0.0798818	0.0652		0.0198258	0.0652
																	0.0799761	0.0653		0.0198522	0.0653
																	0.0800703	0.0654		0.0198786	0.0654
																	0.0801645	0.0655		0.019905	0.0655
																	0.0802586	0.0656		0.0199314	0.0656
																	0.0803527	0.0657		0.0199577	0.0657
																	0.0804468	0.0658		0.0199841	0.0658
																	0.0805408	0.0659		0.0200105	0.0659
																	0.0806348	0.066		0.0200368	0.066
																	0.0807288	0.0661		0.0200632	0.0661
																	0.0808227	0.0662		0.0200896	0.0662
																	0.0809166	0.0663		0.0201159	0.0663
																	0.0810104	0.0664		0.0201422	0.0664
																	0.0811043	0.0665		0.0201686	0.0665
																	0.081198	0.0666		0.0201949	0.0666
																	0.0812918	0.0667		0.0202212	0.0667
																	0.0813855	0.0668		0.0202476	0.0668
																	0.0814791	0.0669		0.0202739	0.0669
																	0.0815728	0.067		0.0203002	0.067
																	0.0816664	0.0671		0.0203265	0.0671
																	0.0817599	0.0672		0.0203528	0.0672
																	0.0818535	0.0673		0.0203791	0.0673
																	0.081947	0.0674		0.0204053	0.0674
																	0.0820404	0.0675		0.0204316	0.0675
																	0.0821338	0.0676		0.0204579	0.0676
																	0.0822272	0.0677		0.0204842	0.0677
																	0.0823206	0.0678		0.0205104	0.0678
																	0.0824139	0.0679		0.0205367	0.0679
																	0.0825071	0.068		0.0205629	0.068
																	0.0826004	0.0681		0.0205892	0.0681
																	0.0826936	0.0682		0.0206154	0.0682
																	0.0827868	0.0683		0.0206417	0.0683
																	0.0828799	0.0684		0.0206679	0.0684
																	0.082973	0.0685		0.0206941	0.0685
																	0.0830661	0.0686		0.0207203	0.0686
																	0.0831591	0.0687		0.0207466	0.0687
																	0.0832521	0.0688		0.0207728	0.0688
																	0.083345	0.0689		0.020799	0.0689
																	0.083438	0.069		0.0208252	0.069
																	0.0835309	0.0691		0.0208514	0.0691
																	0.0836237	0.0692		0.0208776	0.0692
																	0.0837165	0.0693		0.0209037	0.0693
																	0.0838093	0.0694		0.0209299	0.0694
																	0.0839021	0.0695		0.0209561	0.0695
																	0.0839948	0.0696		0.0209822	0.0696
																	0.0840875	0.0697		0.0210084	0.0697
																	0.0841801	0.0698		0.0210346	0.0698
																	0.0842727	0.0699		0.0210607	0.0699
																	0.0843653	0.07		0.0210869	0.07
																	0.0844578	0.0701		0.021113	0.0701
																	0.0845504	0.0702		0.0211391	0.0702
																	0.0846428	0.0703		0.0211653	0.0703
																	0.0847353	0.0704		0.0211914	0.0704
																	0.0848277	0.0705		0.0212175	0.0705
																	0.08492	0.0706		0.0212436	0.0706
																	0.0850124	0.0707		0.0212697	0.0707
																	0.0851047	0.0708		0.0212958	0.0708
																	0.085197	0.0709		0.0213219	0.0709
																	0.0852892	0.071		0.021348	0.071
																	0.0853814	0.0711		0.0213741	0.0711
																	0.0854736	0.0712		0.0214002	0.0712
																	0.0855657	0.0713		0.0214263	0.0713
																	0.0856578	0.0714		0.0214523	0.0714
																	0.0857499	0.0715		0.0214784	0.0715
																	0.0858419	0.0716		0.0215045	0.0716
																	0.0859339	0.0717		0.0215305	0.0717
																	0.0860259	0.0718		0.0215566	0.0718
																	0.0861178	0.0719		0.0215826	0.0719
																	0.0862097	0.072		0.0216087	0.072
																	0.0863016	0.0721		0.0216347	0.0721
																	0.0863934	0.0722		0.0216607	0.0722
																	0.0864852	0.0723		0.0216868	0.0723
																	0.086577	0.0724		0.0217128	0.0724
																	0.0866687	0.0725		0.0217388	0.0725
																	0.0867604	0.0726		0.0217648	0.0726
																	0.0868521	0.0727		0.0217908	0.0727
																	0.0869437	0.0728		0.0218168	0.0728
																	0.0870353	0.0729		0.0218428	0.0729
																	0.0871269	0.073		0.0218688	0.073
																	0.0872184	0.0731		0.0218948	0.0731
																	0.0873099	0.0732		0.0219208	0.0732
																	0.0874014	0.0733		0.0219467	0.0733
																	0.0874929	0.0734		0.0219727	0.0734
																	0.0875843	0.0735		0.0219987	0.0735
																	0.0876756	0.0736		0.0220246	0.0736
																	0.087767	0.0737		0.0220506	0.0737
																	0.0878583	0.0738		0.0220765	0.0738
																	0.0879496	0.0739		0.0221025	0.0739
																	0.0880408	0.074		0.0221284	0.074
																	0.088132	0.0741		0.0221543	0.0741
																	0.0882232	0.0742		0.0221803	0.0742
																	0.0883144	0.0743		0.0222062	0.0743
																	0.0884055	0.0744		0.0222321	0.0744
																	0.0884966	0.0745		0.022258	0.0745
																	0.0885876	0.0746		0.0222839	0.0746
																	0.0886786	0.0747		0.0223098	0.0747
																	0.0887696	0.0748		0.0223357	0.0748
																	0.0888606	0.0749		0.0223616	0.0749
																	0.0889515	0.075		0.0223875	0.075
																	0.0890424	0.0751		0.0224134	0.0751
																	0.0891332	0.0752		0.0224393	0.0752
																	0.0892241	0.0753		0.0224652	0.0753
																	0.0893149	0.0754		0.022491	0.0754
																	0.0894056	0.0755		0.0225169	0.0755
																	0.0894964	0.0756		0.0225428	0.0756
																	0.0895871	0.0757		0.0225686	0.0757
																	0.0896777	0.0758		0.0225945	0.0758
																	0.0897684	0.0759		0.0226203	0.0759
																	0.089859	0.076		0.0226461	0.076
																	0.0899496	0.0761		0.022672	0.0761
																	0.0900401	0.0762		0.0226978	0.0762
																	0.0901306	0.0763		0.0227236	0.0763
																	0.0902211	0.0764		0.0227495	0.0764
																	0.0903115	0.0765		0.0227753	0.0765
																	0.090402	0.0766		0.0228011	0.0766
																	0.0904923	0.0767		0.0228269	0.0767
																	0.0905827	0.0768		0.0228527	0.0768
																	0.090673	0.0769		0.0228785	0.0769
																	0.0907633	0.077		0.0229043	0.077
																	0.0908536	0.0771		0.0229301	0.0771
																	0.0909438	0.0772		0.0229559	0.0772
																	0.091034	0.0773		0.0229816	0.0773
																	0.0911242	0.0774		0.0230074	0.0774
																	0.0912143	0.0775		0.0230332	0.0775
																	0.0913044	0.0776		0.0230589	0.0776
																	0.0913945	0.0777		0.0230847	0.0777
																	0.0914846	0.0778		0.0231105	0.0778
																	0.0915746	0.0779		0.0231362	0.0779
																	0.0916646	0.078		0.0231619	0.078
																	0.0917545	0.0781		0.0231877	0.0781
																	0.0918445	0.0782		0.0232134	0.0782
																	0.0919344	0.0783		0.0232392	0.0783
																	0.0920242	0.0784		0.0232649	0.0784
																	0.0921141	0.0785		0.0232906	0.0785
																	0.0922039	0.0786		0.0233163	0.0786
																	0.0922936	0.0787		0.023342	0.0787
																	0.0923834	0.0788		0.0233677	0.0788
																	0.0924731	0.0789		0.0233934	0.0789
																	0.0925628	0.079		0.0234191	0.079
																	0.0926524	0.0791		0.0234448	0.0791
																	0.0927421	0.0792		0.0234705	0.0792
																	0.0928316	0.0793		0.0234962	0.0793
																	0.0929212	0.0794		0.0235219	0.0794
																	0.0930107	0.0795		0.0235475	0.0795
																	0.0931002	0.0796		0.0235732	0.0796
																	0.0931897	0.0797		0.0235989	0.0797
																	0.0932792	0.0798		0.0236245	0.0798
																	0.0933686	0.0799		0.0236502	0.0799
																	0.093458	0.08		0.0236759	0.08
																	0.0935473	0.0801		0.0237015	0.0801
																	0.0936366	0.0802		0.0237271	0.0802
																	0.0937259	0.0803		0.0237528	0.0803
																	0.0938152	0.0804		0.0237784	0.0804
																	0.0939044	0.0805		0.023804	0.0805
																	0.0939936	0.0806		0.0238297	0.0806
																	0.0940828	0.0807		0.0238553	0.0807
																	0.094172	0.0808		0.0238809	0.0808
																	0.0942611	0.0809		0.0239065	0.0809
																	0.0943502	0.081		0.0239321	0.081
																	0.0944392	0.0811		0.0239577	0.0811
																	0.0945283	0.0812		0.0239833	0.0812
																	0.0946173	0.0813		0.0240089	0.0813
																	0.0947062	0.0814		0.0240345	0.0814
																	0.0947952	0.0815		0.0240601	0.0815
																	0.0948841	0.0816		0.0240856	0.0816
																	0.094973	0.0817		0.0241112	0.0817
																	0.0950618	0.0818		0.0241368	0.0818
																	0.0951507	0.0819		0.0241623	0.0819
																	0.0952395	0.082		0.0241879	0.082
																	0.0953282	0.0821		0.0242135	0.0821
																	0.095417	0.0822		0.024239	0.0822
																	0.0955057	0.0823		0.0242646	0.0823
																	0.0955944	0.0824		0.0242901	0.0824
																	0.095683	0.0825		0.0243156	0.0825
																	0.0957716	0.0826		0.0243412	0.0826
																	0.0958602	0.0827		0.0243667	0.0827
																	0.0959488	0.0828		0.0243922	0.0828
																	0.0960373	0.0829		0.0244177	0.0829
																	0.0961258	0.083		0.0244433	0.083
																	0.0962143	0.0831		0.0244688	0.0831
																	0.0963028	0.0832		0.0244943	0.0832
																	0.0963912	0.0833		0.0245198	0.0833
																	0.0964796	0.0834		0.0245453	0.0834
																	0.096568	0.0835		0.0245708	0.0835
																	0.0966563	0.0836		0.0245963	0.0836
																	0.0967446	0.0837		0.0246217	0.0837
																	0.0968329	0.0838		0.0246472	0.0838
																	0.0969211	0.0839		0.0246727	0.0839
																	0.0970094	0.084		0.0246982	0.084
																	0.0970976	0.0841		0.0247236	0.0841
																	0.0971857	0.0842		0.0247491	0.0842
																	0.0972739	0.0843		0.0247745	0.0843
																	0.097362	0.0844		0.0248	0.0844
																	0.0974501	0.0845		0.0248254	0.0845
																	0.0975381	0.0846		0.0248509	0.0846
																	0.0976262	0.0847		0.0248763	0.0847
																	0.0977142	0.0848		0.0249018	0.0848
																	0.0978021	0.0849		0.0249272	0.0849
																	0.0978901	0.085		0.0249526	0.085
																	0.097978	0.0851		0.024978	0.0851
																	0.0980659	0.0852		0.0250035	0.0852
																	0.0981537	0.0853		0.0250289	0.0853
																	0.0982416	0.0854		0.0250543	0.0854
																	0.0983294	0.0855		0.0250797	0.0855
																	0.0984172	0.0856		0.0251051	0.0856
																	0.0985049	0.0857		0.0251305	0.0857
																	0.0985926	0.0858		0.0251559	0.0858
																	0.0986803	0.0859		0.0251813	0.0859
																	0.098768	0.086		0.0252067	0.086
																	0.0988556	0.0861		0.025232	0.0861
																	0.0989433	0.0862		0.0252574	0.0862
																	0.0990308	0.0863		0.0252828	0.0863
																	0.0991184	0.0864		0.0253081	0.0864
																	0.0992059	0.0865		0.0253335	0.0865
																	0.0992934	0.0866		0.0253589	0.0866
																	0.0993809	0.0867		0.0253842	0.0867
																	0.0994684	0.0868		0.0254096	0.0868
																	0.0995558	0.0869		0.0254349	0.0869
																	0.0996432	0.087		0.0254603	0.087
																	0.0997305	0.0871		0.0254856	0.0871
																	0.0998179	0.0872		0.0255109	0.0872
																	0.0999052	0.0873		0.0255363	0.0873
																	0.0999925	0.0874		0.0255616	0.0874
																	0.10008	0.0875		0.0255869	0.0875
																	0.100167	0.0876		0.0256122	0.0876
																	0.100254	0.0877		0.0256375	0.0877
																	0.100341	0.0878		0.0256628	0.0878
																	0.100429	0.0879		0.0256881	0.0879
																	0.100516	0.088		0.0257134	0.088
																	0.100603	0.0881		0.0257387	0.0881
																	0.10069	0.0882		0.025764	0.0882
																	0.100777	0.0883		0.0257893	0.0883
																	0.100864	0.0884		0.0258146	0.0884
																	0.100951	0.0885		0.0258399	0.0885
																	0.101038	0.0886		0.0258651	0.0886
																	0.101125	0.0887		0.0258904	0.0887
																	0.101212	0.0888		0.0259157	0.0888
																	0.101299	0.0889		0.0259409	0.0889
																	0.101385	0.089		0.0259662	0.089
																	0.101472	0.0891		0.0259914	0.0891
																	0.101559	0.0892		0.0260167	0.0892
																	0.101646	0.0893		0.0260419	0.0893
																	0.101733	0.0894		0.0260672	0.0894
																	0.101819	0.0895		0.0260924	0.0895
																	0.101906	0.0896		0.0261176	0.0896
																	0.101993	0.0897		0.0261429	0.0897
																	0.102079	0.0898		0.0261681	0.0898
																	0.102166	0.0899		0.0261933	0.0899
																	0.102253	0.09		0.0262185	0.09
																	0.102339	0.0901		0.0262437	0.0901
																	0.102426	0.0902		0.026269	0.0902
																	0.102512	0.0903		0.0262942	0.0903
																	0.102599	0.0904		0.0263194	0.0904
																	0.102685	0.0905		0.0263445	0.0905
																	0.102772	0.0906		0.0263697	0.0906
																	0.102858	0.0907		0.0263949	0.0907
																	0.102944	0.0908		0.0264201	0.0908
																	0.103031	0.0909		0.0264453	0.0909
																	0.103117	0.091		0.0264705	0.091
																	0.103203	0.0911		0.0264956	0.0911
																	0.10329	0.0912		0.0265208	0.0912
																	0.103376	0.0913		0.026546	0.0913
																	0.103462	0.0914		0.0265711	0.0914
																	0.103548	0.0915		0.0265963	0.0915
																	0.103635	0.0916		0.0266214	0.0916
																	0.103721	0.0917		0.0266466	0.0917
																	0.103807	0.0918		0.0266717	0.0918
																	0.103893	0.0919		0.0266969	0.0919
																	0.103979	0.092		0.026722	0.092
																	0.104065	0.0921		0.0267471	0.0921
																	0.104151	0.0922		0.0267722	0.0922
																	0.104237	0.0923		0.0267974	0.0923
																	0.104323	0.0924		0.0268225	0.0924
																	0.104409	0.0925		0.0268476	0.0925
																	0.104495	0.0926		0.0268727	0.0926
																	0.104581	0.0927		0.0268978	0.0927
																	0.104667	0.0928		0.0269229	0.0928
																	0.104753	0.0929		0.026948	0.0929
																	0.104838	0.093		0.0269731	0.093
																	0.104924	0.0931		0.0269982	0.0931
																	0.10501	0.0932		0.0270233	0.0932
																	0.105096	0.0933		0.0270484	0.0933
																	0.105181	0.0934		0.0270735	0.0934
																	0.105267	0.0935		0.0270985	0.0935
																	0.105353	0.0936		0.0271236	0.0936
																	0.105438	0.0937		0.0271487	0.0937
																	0.105524	0.0938		0.0271737	0.0938
																	0.10561	0.0939		0.0271988	0.0939
																	0.105695	0.094		0.0272238	0.094
																	0.105781	0.0941		0.0272489	0.0941
																	0.105866	0.0942		0.0272739	0.0942
																	0.105952	0.0943		0.027299	0.0943
																	0.106037	0.0944		0.027324	0.0944
																	0.106123	0.0945		0.0273491	0.0945
																	0.106208	0.0946		0.0273741	0.0946
																	0.106293	0.0947		0.0273991	0.0947
																	0.106379	0.0948		0.0274241	0.0948
																	0.106464	0.0949		0.0274492	0.0949
																	0.106549	0.095		0.0274742	0.095
																	0.106635	0.0951		0.0274992	0.0951
																	0.10672	0.0952		0.0275242	0.0952
																	0.106805	0.0953		0.0275492	0.0953
																	0.106891	0.0954		0.0275742	0.0954
																	0.106976	0.0955		0.0275992	0.0955
																	0.107061	0.0956		0.0276242	0.0956
																	0.107146	0.0957		0.0276492	0.0957
																	0.107231	0.0958		0.0276742	0.0958
																	0.107316	0.0959		0.0276991	0.0959
																	0.107401	0.096		0.0277241	0.096
																	0.107486	0.0961		0.0277491	0.0961
																	0.107571	0.0962		0.0277741	0.0962
																	0.107656	0.0963		0.027799	0.0963
																	0.107741	0.0964		0.027824	0.0964
																	0.107826	0.0965		0.027849	0.0965
																	0.107911	0.0966		0.0278739	0.0966
																	0.107996	0.0967		0.0278989	0.0967
																	0.108081	0.0968		0.0279238	0.0968
																	0.108166	0.0969		0.0279487	0.0969
																	0.108251	0.097		0.0279737	0.097
																	0.108336	0.0971		0.0279986	0.0971
																	0.10842	0.0972		0.0280236	0.0972
																	0.108505	0.0973		0.0280485	0.0973
																	0.10859	0.0974		0.0280734	0.0974
																	0.108675	0.0975		0.0280983	0.0975
																	0.108759	0.0976		0.0281232	0.0976
																	0.108844	0.0977		0.0281482	0.0977
																	0.108929	0.0978		0.0281731	0.0978
																	0.109013	0.0979		0.028198	0.0979
																	0.109098	0.098		0.0282229	0.098
																	0.109182	0.0981		0.0282478	0.0981
																	0.109267	0.0982		0.0282727	0.0982
																	0.109351	0.0983		0.0282976	0.0983
																	0.109436	0.0984		0.0283224	0.0984
																	0.10952	0.0985		0.0283473	0.0985
																	0.109605	0.0986		0.0283722	0.0986
																	0.109689	0.0987		0.0283971	0.0987
																	0.109774	0.0988		0.0284219	0.0988
																	0.109858	0.0989		0.0284468	0.0989
																	0.109942	0.099		0.0284717	0.099
																	0.110027	0.0991		0.0284965	0.0991
																	0.110111	0.0992		0.0285214	0.0992
																	0.110195	0.0993		0.0285462	0.0993
																	0.11028	0.0994		0.0285711	0.0994
																	0.110364	0.0995		0.0285959	0.0995
																	0.110448	0.0996		0.0286208	0.0996
																	0.110532	0.0997		0.0286456	0.0997
																	0.110616	0.0998		0.0286705	0.0998
																	0.110701	0.0999		0.0286953	0.0999
																	0.110785	0.1		0.0287201	0.1
																	0.111625	0.101		0.0289682	0.101
																	0.112462	0.102		0.0292159	0.102
																	0.113297	0.103		0.0294632	0.103
																	0.11413	0.104		0.0297102	0.104
																	0.114961	0.105		0.0299568	0.105
																	0.11579	0.106		0.0302031	0.106
																	0.116616	0.107		0.030449	0.107
																	0.11744	0.108		0.0306946	0.108
																	0.118262	0.109		0.0309398	0.109
																	0.119082	0.11		0.0311847	0.11
																	0.1199	0.111		0.0314293	0.111
																	0.120716	0.112		0.0316735	0.112
																	0.121529	0.113		0.0319174	0.113
																	0.122341	0.114		0.032161	0.114
																	0.12315	0.115		0.0324042	0.115
																	0.123958	0.116		0.0326471	0.116
																	0.124763	0.117		0.0328897	0.117
																	0.125567	0.118		0.033132	0.118
																	0.126368	0.119		0.033374	0.119
																	0.127168	0.12		0.0336156	0.12
																	0.127966	0.121		0.033857	0.121
																	0.128761	0.122		0.0340981	0.122
																	0.129555	0.123		0.0343388	0.123
																	0.130347	0.124		0.0345792	0.124
																	0.131137	0.125		0.0348194	0.125
																	0.131926	0.126		0.0350592	0.126
																	0.132712	0.127		0.0352988	0.127
																	0.133497	0.128		0.0355381	0.128
																	0.13428	0.129		0.035777	0.129
																	0.135061	0.13		0.0360157	0.13
																	0.13584	0.131		0.0362541	0.131
																	0.136617	0.132		0.0364922	0.132
																	0.137393	0.133		0.0367301	0.133
																	0.138167	0.134		0.0369676	0.134
																	0.138939	0.135		0.0372049	0.135
																	0.13971	0.136		0.0374419	0.136
																	0.140479	0.137		0.0376786	0.137
																	0.141246	0.138		0.0379151	0.138
																	0.142012	0.139		0.0381513	0.139
																	0.142776	0.14		0.0383872	0.14
																	0.143538	0.141		0.0386229	0.141
																	0.144299	0.142		0.0388583	0.142
																	0.145058	0.143		0.0390934	0.143
																	0.145815	0.144		0.0393283	0.144
																	0.146571	0.145		0.0395629	0.145
																	0.147325	0.146		0.0397972	0.146
																	0.148078	0.147		0.0400313	0.147
																	0.148829	0.148		0.0402652	0.148
																	0.149579	0.149		0.0404988	0.149
																	0.150327	0.15		0.0407321	0.15
																	0.151073	0.151		0.0409652	0.151
																	0.151818	0.152		0.0411981	0.152
																	0.152562	0.153		0.0414307	0.153
																	0.153304	0.154		0.041663	0.154
																	0.154044	0.155		0.0418951	0.155
																	0.154783	0.156		0.042127	0.156
																	0.155521	0.157		0.0423587	0.157
																	0.156257	0.158		0.04259	0.158
																	0.156991	0.159		0.0428212	0.159
																	0.157725	0.16		0.0430521	0.16
																	0.158457	0.161		0.0432828	0.161
																	0.159187	0.162		0.0435133	0.162
																	0.159916	0.163		0.0437435	0.163
																	0.160644	0.164		0.0439735	0.164
																	0.16137	0.165		0.0442033	0.165
																	0.162095	0.166		0.0444328	0.166
																	0.162818	0.167		0.0446622	0.167
																	0.16354	0.168		0.0448912	0.168
																	0.164261	0.169		0.0451201	0.169
																	0.16498	0.17		0.0453488	0.17
																	0.165698	0.171		0.0455772	0.171
																	0.166415	0.172		0.0458054	0.172
																	0.16713	0.173		0.0460334	0.173
																	0.167844	0.174		0.0462612	0.174
																	0.168557	0.175		0.0464887	0.175
																	0.169269	0.176		0.0467161	0.176
																	0.169979	0.177		0.0469432	0.177
																	0.170688	0.178		0.0471701	0.178
																	0.171395	0.179		0.0473968	0.179
																	0.172102	0.18		0.0476233	0.18
																	0.172807	0.181		0.0478496	0.181
																	0.173511	0.182		0.0480757	0.182
																	0.174213	0.183		0.0483015	0.183
																	0.174914	0.184		0.0485272	0.184
																	0.175615	0.185		0.0487527	0.185
																	0.176313	0.186		0.0489779	0.186
																	0.177011	0.187		0.049203	0.187
																	0.177708	0.188		0.0494278	0.188
																	0.178403	0.189		0.0496525	0.189
																	0.179097	0.19		0.0498769	0.19
																	0.17979	0.191		0.0501012	0.191
																	0.180481	0.192		0.0503252	0.192
																	0.181172	0.193		0.0505491	0.193
																	0.181861	0.194		0.0507727	0.194
																	0.182549	0.195		0.0509962	0.195
																	0.183236	0.196		0.0512195	0.196
																	0.183922	0.197		0.0514425	0.197
																	0.184607	0.198		0.0516654	0.198
																	0.18529	0.199		0.0518881	0.199
																	0.185973	0.2		0.0521106	0.2
																	0.186654	0.201		0.0523329	0.201
																	0.187334	0.202		0.052555	0.202
																	0.188013	0.203		0.052777	0.203
																	0.188691	0.204		0.0529987	0.204
																	0.189368	0.205		0.0532203	0.205
																	0.190044	0.206		0.0534417	0.206
																	0.190718	0.207		0.0536629	0.207
																	0.191392	0.208		0.0538839	0.208
																	0.192064	0.209		0.0541047	0.209
																	0.192736	0.21		0.0543253	0.21
																	0.193406	0.211		0.0545458	0.211
																	0.194075	0.212		0.0547661	0.212
																	0.194744	0.213		0.0549862	0.213
																	0.195411	0.214		0.0552061	0.214
																	0.196077	0.215		0.0554259	0.215
																	0.196742	0.216		0.0556454	0.216
																	0.197406	0.217		0.0558648	0.217
																	0.198069	0.218		0.056084	0.218
																	0.19873	0.219		0.0563031	0.219
																	0.199391	0.22		0.0565219	0.22
																	0.200051	0.221		0.0567406	0.221
																	0.20071	0.222		0.0569592	0.222
																	0.201368	0.223		0.0571775	0.223
																	0.202025	0.224		0.0573957	0.224
																	0.20268	0.225		0.0576137	0.225
																	0.203335	0.226		0.0578315	0.226
																	0.203989	0.227		0.0580492	0.227
																	0.204642	0.228		0.0582667	0.228
																	0.205294	0.229		0.058484	0.229
																	0.205944	0.23		0.0587012	0.23
																	0.206594	0.231		0.0589182	0.231
																	0.207243	0.232		0.059135	0.232
																	0.207891	0.233		0.0593517	0.233
																	0.208538	0.234		0.0595682	0.234
																	0.209184	0.235		0.0597845	0.235
																	0.209829	0.236		0.0600007	0.236
																	0.210473	0.237		0.0602167	0.237
																	0.211116	0.238		0.0604325	0.238
																	0.211759	0.239		0.0606482	0.239
																	0.2124	0.24		0.0608637	0.24
																	0.21304	0.241		0.0610791	0.241
																	0.21368	0.242		0.0612943	0.242
																	0.214318	0.243		0.0615093	0.243
																	0.214956	0.244		0.0617242	0.244
																	0.215592	0.245		0.0619389	0.245
																	0.216228	0.246		0.0621535	0.246
																	0.216863	0.247		0.0623679	0.247
																	0.217497	0.248		0.0625822	0.248
																	0.21813	0.249		0.0627963	0.249
																	0.218762	0.25		0.0630102	0.25
																	0.219393	0.251		0.063224	0.251
																	0.220023	0.252		0.0634376	0.252
																	0.220653	0.253		0.0636511	0.253
																	0.221281	0.254		0.0638645	0.254
																	0.221909	0.255		0.0640776	0.255
																	0.222536	0.256		0.0642907	0.256
																	0.223161	0.257		0.0645035	0.257
																	0.223787	0.258		0.0647163	0.258
																	0.224411	0.259		0.0649288	0.259
																	0.225034	0.26		0.0651413	0.26
																	0.225656	0.261		0.0653535	0.261
																	0.226278	0.262		0.0655657	0.262
																	0.226899	0.263		0.0657776	0.263
																	0.227519	0.264		0.0659895	0.264
																	0.228138	0.265		0.0662012	0.265
																	0.228756	0.266		0.0664127	0.266
																	0.229373	0.267		0.0666241	0.267
																	0.22999	0.268		0.0668353	0.268
																	0.230605	0.269		0.0670464	0.269
																	0.23122	0.27		0.0672574	0.27
																	0.231834	0.271		0.0674682	0.271
																	0.232448	0.272		0.0676789	0.272
																	0.23306	0.273		0.0678894	0.273
																	0.233672	0.274		0.0680998	0.274
																	0.234282	0.275		0.06831	0.275
																	0.234892	0.276		0.0685201	0.276
																	0.235501	0.277		0.0687301	0.277
																	0.23611	0.278		0.0689399	0.278
																	0.236717	0.279		0.0691495	0.279
																	0.237324	0.28		0.0693591	0.28
																	0.23793	0.281		0.0695685	0.281
																	0.238535	0.282		0.0697777	0.282
																	0.239139	0.283		0.0699868	0.283
																	0.239743	0.284		0.0701958	0.284
																	0.240346	0.285		0.0704047	0.285
																	0.240948	0.286		0.0706134	0.286
																	0.241549	0.287		0.0708219	0.287
																	0.242149	0.288		0.0710304	0.288
																	0.242749	0.289		0.0712387	0.289
																	0.243348	0.29		0.0714468	0.29
																	0.243946	0.291		0.0716548	0.291
																	0.244544	0.292		0.0718627	0.292
																	0.24514	0.293		0.0720705	0.293
																	0.245736	0.294		0.0722781	0.294
																	0.246331	0.295		0.0724856	0.295
																	0.246926	0.296		0.0726929	0.296
																	0.247519	0.297		0.0729002	0.297
																	0.248112	0.298		0.0731072	0.298
																	0.248704	0.299		0.0733142	0.299
																	0.249295	0.3		0.073521	0.3
																	0.249886	0.301		0.0737277	0.301
																	0.250476	0.302		0.0739343	0.302
																	0.251065	0.303		0.0741407	0.303
																	0.251654	0.304		0.074347	0.304
																	0.252241	0.305		0.0745532	0.305
																	0.252828	0.306		0.0747592	0.306
																	0.253414	0.307		0.0749651	0.307
																	0.254	0.308		0.0751709	0.308
																	0.254585	0.309		0.0753766	0.309
																	0.255169	0.31		0.0755821	0.31
																	0.255752	0.311		0.0757875	0.311
																	0.256335	0.312		0.0759928	0.312
																	0.256917	0.313		0.0761979	0.313
																	0.257498	0.314		0.0764029	0.314
																	0.258079	0.315		0.0766078	0.315
																	0.258658	0.316		0.0768126	0.316
																	0.259238	0.317		0.0770172	0.317
																	0.259816	0.318		0.0772218	0.318
																	0.260394	0.319		0.0774262	0.319
																	0.260971	0.32		0.0776304	0.32
																	0.261547	0.321		0.0778346	0.321
																	0.262123	0.322		0.0780386	0.322
																	0.262698	0.323		0.0782425	0.323
																	0.263272	0.324		0.0784463	0.324
																	0.263846	0.325		0.0786499	0.325
																	0.264419	0.326		0.0788535	0.326
																	0.264991	0.327		0.0790569	0.327
																	0.265562	0.328		0.0792602	0.328
																	0.266133	0.329		0.0794633	0.329
																	0.266704	0.33		0.0796664	0.33
																	0.267273	0.331		0.0798693	0.331
																	0.267842	0.332		0.0800721	0.332
																	0.26841	0.333		0.0802748	0.333
																	0.268978	0.334		0.0804773	0.334
																	0.269545	0.335		0.0806798	0.335
																	0.270111	0.336		0.0808821	0.336
																	0.270677	0.337		0.0810843	0.337
																	0.271241	0.338		0.0812864	0.338
																	0.271806	0.339		0.0814884	0.339
																	0.272369	0.34		0.0816902	0.34
																	0.272932	0.341		0.081892	0.341
																	0.273495	0.342		0.0820936	0.342
																	0.274056	0.343		0.0822951	0.343
																	0.274617	0.344		0.0824965	0.344
																	0.275178	0.345		0.0826977	0.345
																	0.275738	0.346		0.0828989	0.346
																	0.276297	0.347		0.0830999	0.347
																	0.276855	0.348		0.0833009	0.348
																	0.277413	0.349		0.0835017	0.349
																	0.27797	0.35		0.0837024	0.35
																	0.278527	0.351		0.0839029	0.351
																	0.279083	0.352		0.0841034	0.352
																	0.279638	0.353		0.0843037	0.353
																	0.280193	0.354		0.084504	0.354
																	0.280747	0.355		0.0847041	0.355
																	0.281301	0.356		0.0849041	0.356
																	0.281853	0.357		0.085104	0.357
																	0.282406	0.358		0.0853038	0.358
																	0.282957	0.359		0.0855035	0.359
																	0.283508	0.36		0.085703	0.36
																	0.284059	0.361		0.0859025	0.361
																	0.284609	0.362		0.0861018	0.362
																	0.285158	0.363		0.086301	0.363
																	0.285706	0.364		0.0865001	0.364
																	0.286254	0.365		0.0866991	0.365
																	0.286802	0.366		0.086898	0.366
																	0.287349	0.367		0.0870968	0.367
																	0.287895	0.368		0.0872955	0.368
																	0.28844	0.369		0.0874941	0.369
																	0.288985	0.37		0.0876925	0.37
																	0.28953	0.371		0.0878908	0.371
																	0.290074	0.372		0.0880891	0.372
																	0.290617	0.373		0.0882872	0.373
																	0.29116	0.374		0.0884852	0.374
																	0.291702	0.375		0.0886831	0.375
																	0.292243	0.376		0.0888809	0.376
																	0.292784	0.377		0.0890786	0.377
																	0.293324	0.378		0.0892762	0.378
																	0.293864	0.379		0.0894737	0.379
																	0.294403	0.38		0.0896711	0.38
																	0.294942	0.381		0.0898683	0.381
																	0.29548	0.382		0.0900655	0.382
																	0.296017	0.383		0.0902626	0.383
																	0.296554	0.384		0.0904595	0.384
																	0.29709	0.385		0.0906564	0.385
																	0.297626	0.386		0.0908531	0.386
																	0.298161	0.387		0.0910497	0.387
																	0.298696	0.388		0.0912462	0.388
																	0.29923	0.389		0.0914427	0.389
																	0.299763	0.39		0.091639	0.39
																	0.300296	0.391		0.0918352	0.391
																	0.300829	0.392		0.0920313	0.392
																	0.30136	0.393		0.0922273	0.393
																	0.301892	0.394		0.0924232	0.394
																	0.302422	0.395		0.092619	0.395
																	0.302952	0.396		0.0928147	0.396
																	0.303482	0.397		0.0930103	0.397
																	0.304011	0.398		0.0932058	0.398
																	0.304539	0.399		0.0934012	0.399
																	0.305067	0.4		0.0935965	0.4
																	0.305595	0.401		0.0937917	0.401
																	0.306122	0.402		0.0939867	0.402
																	0.306648	0.403		0.0941817	0.403
																	0.307174	0.404		0.0943766	0.404
																	0.307699	0.405		0.0945714	0.405
																	0.308224	0.406		0.0947661	0.406
																	0.308748	0.407		0.0949606	0.407
																	0.309271	0.408		0.0951551	0.408
																	0.309794	0.409		0.0953495	0.409
																	0.310317	0.41		0.0955438	0.41
																	0.310839	0.411		0.0957379	0.411
																	0.31136	0.412		0.095932	0.412
																	0.311881	0.413		0.096126	0.413
																	0.312402	0.414		0.0963199	0.414
																	0.312922	0.415		0.0965137	0.415
																	0.313441	0.416		0.0967073	0.416
																	0.31396	0.417		0.0969009	0.417
																	0.314478	0.418		0.0970944	0.418
																	0.314996	0.419		0.0972878	0.419
																	0.315513	0.42		0.0974811	0.42
																	0.31603	0.421		0.0976743	0.421
																	0.316546	0.422		0.0978674	0.422
																	0.317062	0.423		0.0980603	0.423
																	0.317577	0.424		0.0982532	0.424
																	0.318092	0.425		0.098446	0.425
																	0.318606	0.426		0.0986387	0.426
																	0.31912	0.427		0.0988314	0.427
																	0.319633	0.428		0.0990239	0.428
																	0.320146	0.429		0.0992163	0.429
																	0.320658	0.43		0.0994086	0.43
																	0.32117	0.431		0.0996008	0.431
																	0.321681	0.432		0.099793	0.432
																	0.322191	0.433		0.099985	0.433
																	0.322702	0.434		0.100177	0.434
																	0.323211	0.435		0.100369	0.435
																	0.32372	0.436		0.100561	0.436
																	0.324229	0.437		0.100752	0.437
																	0.324737	0.438		0.100944	0.438
																	0.325245	0.439		0.101135	0.439
																	0.325752	0.44		0.101327	0.44
																	0.326259	0.441		0.101518	0.441
																	0.326765	0.442		0.101709	0.442
																	0.327271	0.443		0.1019	0.443
																	0.327776	0.444		0.102091	0.444
																	0.328281	0.445		0.102282	0.445
																	0.328785	0.446		0.102473	0.446
																	0.329289	0.447		0.102664	0.447
																	0.329792	0.448		0.102854	0.448
																	0.330295	0.449		0.103045	0.449
																	0.330797	0.45		0.103235	0.45
																	0.331299	0.451		0.103425	0.451
																	0.3318	0.452		0.103616	0.452
																	0.332301	0.453		0.103806	0.453
																	0.332802	0.454		0.103996	0.454
																	0.333301	0.455		0.104186	0.455
																	0.333801	0.456		0.104376	0.456
																	0.3343	0.457		0.104566	0.457
																	0.334798	0.458		0.104755	0.458
																	0.335296	0.459		0.104945	0.459
																	0.335794	0.46		0.105134	0.46
																	0.336291	0.461		0.105324	0.461
																	0.336788	0.462		0.105513	0.462
																	0.337284	0.463		0.105702	0.463
																	0.33778	0.464		0.105892	0.464
																	0.338275	0.465		0.106081	0.465
																	0.33877	0.466		0.10627	0.466
																	0.339264	0.467		0.106459	0.467
																	0.339758	0.468		0.106647	0.468
																	0.340251	0.469		0.106836	0.469
																	0.340744	0.47		0.107025	0.47
																	0.341236	0.471		0.107213	0.471
																	0.341728	0.472		0.107402	0.472
																	0.34222	0.473		0.10759	0.473
																	0.342711	0.474		0.107778	0.474
																	0.343202	0.475		0.107967	0.475
																	0.343692	0.476		0.108155	0.476
																	0.344182	0.477		0.108343	0.477
																	0.344671	0.478		0.108531	0.478
																	0.34516	0.479		0.108718	0.479
																	0.345648	0.48		0.108906	0.48
																	0.346136	0.481		0.109094	0.481
																	0.346624	0.482		0.109281	0.482
																	0.347111	0.483		0.109469	0.483
																	0.347597	0.484		0.109656	0.484
																	0.348083	0.485		0.109844	0.485
																	0.348569	0.486		0.110031	0.486
																	0.349054	0.487		0.110218	0.487
																	0.349539	0.488		0.110405	0.488
																	0.350024	0.489		0.110592	0.489
																	0.350508	0.49		0.110779	0.49
																	0.350991	0.491		0.110966	0.491
																	0.351474	0.492		0.111152	0.492
																	0.351957	0.493		0.111339	0.493
																	0.352439	0.494		0.111526	0.494
																	0.352921	0.495		0.111712	0.495
																	0.353402	0.496		0.111898	0.496
																	0.353883	0.497		0.112085	0.497
																	0.354364	0.498		0.112271	0.498
																	0.354844	0.499		0.112457	0.499
																	0.355323	0.5		0.112643	0.5
																	0.355802	0.501		0.112829	0.501
																	0.356281	0.502		0.113015	0.502
																	0.35676	0.503		0.113201	0.503
																	0.357237	0.504		0.113386	0.504
																	0.357715	0.505		0.113572	0.505
																	0.358192	0.506		0.113757	0.506
																	0.358669	0.507		0.113943	0.507
																	0.359145	0.508		0.114128	0.508
																	0.359621	0.509		0.114314	0.509
																	0.360096	0.51		0.114499	0.51
																	0.360571	0.511		0.114684	0.511
																	0.361046	0.512		0.114869	0.512
																	0.36152	0.513		0.115054	0.513
																	0.361993	0.514		0.115239	0.514
																	0.362467	0.515		0.115424	0.515
																	0.36294	0.516		0.115608	0.516
																	0.363412	0.517		0.115793	0.517
																	0.363884	0.518		0.115977	0.518
																	0.364356	0.519		0.116162	0.519
																	0.364827	0.52		0.116346	0.52
																	0.365298	0.521		0.116531	0.521
																	0.365768	0.522		0.116715	0.522
																	0.366238	0.523		0.116899	0.523
																	0.366708	0.524		0.117083	0.524
																	0.367177	0.525		0.117267	0.525
																	0.367646	0.526		0.117451	0.526
																	0.368114	0.527		0.117635	0.527
																	0.368582	0.528		0.117818	0.528
																	0.36905	0.529		0.118002	0.529
																	0.369517	0.53		0.118186	0.53
																	0.369984	0.531		0.118369	0.531
																	0.37045	0.532		0.118552	0.532
																	0.370916	0.533		0.118736	0.533
																	0.371381	0.534		0.118919	0.534
																	0.371847	0.535		0.119102	0.535
																	0.372311	0.536		0.119285	0.536
																	0.372776	0.537		0.119468	0.537
																	0.37324	0.538		0.119651	0.538
																	0.373703	0.539		0.119834	0.539
																	0.374167	0.54		0.120017	0.54
																	0.374629	0.541		0.1202	0.541
																	0.375092	0.542		0.120382	0.542
																	0.375554	0.543		0.120565	0.543
																	0.376015	0.544		0.120747	0.544
																	0.376477	0.545		0.12093	0.545
																	0.376937	0.546		0.121112	0.546
																	0.377398	0.547		0.121294	0.547
																	0.377858	0.548		0.121476	0.548
																	0.378318	0.549		0.121658	0.549
																	0.378777	0.55		0.12184	0.55
																	0.379236	0.551		0.122022	0.551
																	0.379694	0.552		0.122204	0.552
																	0.380153	0.553		0.122386	0.553
																	0.38061	0.554		0.122567	0.554
																	0.381068	0.555		0.122749	0.555
																	0.381525	0.556		0.122931	0.556
																	0.381981	0.557		0.123112	0.557
																	0.382437	0.558		0.123293	0.558
																	0.382893	0.559		0.123475	0.559
																	0.383349	0.56		0.123656	0.56
																	0.383804	0.561		0.123837	0.561
																	0.384259	0.562		0.124018	0.562
																	0.384713	0.563		0.124199	0.563
																	0.385167	0.564		0.12438	0.564
																	0.385621	0.565		0.124561	0.565
																	0.386074	0.566		0.124742	0.566
																	0.386527	0.567		0.124922	0.567
																	0.386979	0.568		0.125103	0.568
																	0.387431	0.569		0.125284	0.569
																	0.387883	0.57		0.125464	0.57
																	0.388334	0.571		0.125644	0.571
																	0.388785	0.572		0.125825	0.572
																	0.389236	0.573		0.126005	0.573
																	0.389686	0.574		0.126185	0.574
																	0.390136	0.575		0.126365	0.575
																	0.390586	0.576		0.126545	0.576
																	0.391035	0.577		0.126725	0.577
																	0.391483	0.578		0.126905	0.578
																	0.391932	0.579		0.127085	0.579
																	0.39238	0.58		0.127264	0.58
																	0.392828	0.581		0.127444	0.581
																	0.393275	0.582		0.127624	0.582
																	0.393722	0.583		0.127803	0.583
																	0.394169	0.584		0.127983	0.584
																	0.394615	0.585		0.128162	0.585
																	0.395061	0.586		0.128341	0.586
																	0.395506	0.587		0.12852	0.587
																	0.395951	0.588		0.1287	0.588
																	0.396396	0.589		0.128879	0.589
																	0.396841	0.59		0.129058	0.59
																	0.397285	0.591		0.129236	0.591
																	0.397729	0.592		0.129415	0.592
																	0.398172	0.593		0.129594	0.593
																	0.398615	0.594		0.129773	0.594
																	0.399058	0.595		0.129951	0.595
																	0.3995	0.596		0.13013	0.596
																	0.399942	0.597		0.130308	0.597
																	0.400384	0.598		0.130487	0.598
																	0.400825	0.599		0.130665	0.599
																	0.401266	0.6		0.130843	0.6
																	0.401706	0.601		0.131021	0.601
																	0.402147	0.602		0.1312	0.602
																	0.402586	0.603		0.131378	0.603
																	0.403026	0.604		0.131556	0.604
																	0.403465	0.605		0.131733	0.605
																	0.403904	0.606		0.131911	0.606
																	0.404343	0.607		0.132089	0.607
																	0.404781	0.608		0.132267	0.608
																	0.405218	0.609		0.132444	0.609
																	0.405656	0.61		0.132622	0.61
																	0.406093	0.611		0.132799	0.611
																	0.40653	0.612		0.132977	0.612
																	0.406966	0.613		0.133154	0.613
																	0.407402	0.614		0.133331	0.614
																	0.407838	0.615		0.133508	0.615
																	0.408274	0.616		0.133686	0.616
																	0.408709	0.617		0.133863	0.617
																	0.409143	0.618		0.13404	0.618
																	0.409578	0.619		0.134216	0.619
																	0.410012	0.62		0.134393	0.62
																	0.410445	0.621		0.13457	0.621
																	0.410879	0.622		0.134747	0.622
																	0.411312	0.623		0.134923	0.623
																	0.411745	0.624		0.1351	0.624
																	0.412177	0.625		0.135276	0.625
																	0.412609	0.626		0.135453	0.626
																	0.413041	0.627		0.135629	0.627
																	0.413472	0.628		0.135805	0.628
																	0.413903	0.629		0.135982	0.629
																	0.414334	0.63		0.136158	0.63
																	0.414764	0.631		0.136334	0.631
																	0.415194	0.632		0.13651	0.632
																	0.415624	0.633		0.136686	0.633
																	0.416053	0.634		0.136862	0.634
																	0.416483	0.635		0.137037	0.635
																	0.416911	0.636		0.137213	0.636
																	0.41734	0.637		0.137389	0.637
																	0.417768	0.638		0.137564	0.638
																	0.418196	0.639		0.13774	0.639
																	0.418623	0.64		0.137915	0.64
																	0.41905	0.641		0.138091	0.641
																	0.419477	0.642		0.138266	0.642
																	0.419903	0.643		0.138441	0.643
																	0.420329	0.644		0.138616	0.644
																	0.420755	0.645		0.138791	0.645
																	0.421181	0.646		0.138967	0.646
																	0.421606	0.647		0.139141	0.647
																	0.422031	0.648		0.139316	0.648
																	0.422455	0.649		0.139491	0.649
																	0.42288	0.65		0.139666	0.65
																	0.423303	0.651		0.139841	0.651
																	0.423727	0.652		0.140015	0.652
																	0.42415	0.653		0.14019	0.653
																	0.424573	0.654		0.140364	0.654
																	0.424996	0.655		0.140539	0.655
																	0.425418	0.656		0.140713	0.656
																	0.42584	0.657		0.140887	0.657
																	0.426262	0.658		0.141062	0.658
																	0.426683	0.659		0.141236	0.659
																	0.427104	0.66		0.14141	0.66
																	0.427525	0.661		0.141584	0.661
																	0.427945	0.662		0.141758	0.662
																	0.428365	0.663		0.141932	0.663
																	0.428785	0.664		0.142106	0.664
																	0.429205	0.665		0.142279	0.665
																	0.429624	0.666		0.142453	0.666
																	0.430043	0.667		0.142627	0.667
																	0.430461	0.668		0.1428	0.668
																	0.430879	0.669		0.142974	0.669
																	0.431297	0.67		0.143147	0.67
																	0.431715	0.671		0.143321	0.671
																	0.432132	0.672		0.143494	0.672
																	0.432549	0.673		0.143667	0.673
																	0.432966	0.674		0.14384	0.674
																	0.433382	0.675		0.144013	0.675
																	0.433798	0.676		0.144186	0.676
																	0.434214	0.677		0.144359	0.677
																	0.43463	0.678		0.144532	0.678
																	0.435045	0.679		0.144705	0.679
																	0.43546	0.68		0.144878	0.68
																	0.435874	0.681		0.145051	0.681
																	0.436289	0.682		0.145223	0.682
																	0.436703	0.683		0.145396	0.683
																	0.437116	0.684		0.145568	0.684
																	0.43753	0.685		0.145741	0.685
																	0.437943	0.686		0.145913	0.686
																	0.438355	0.687		0.146086	0.687
																	0.438768	0.688		0.146258	0.688
																	0.43918	0.689		0.14643	0.689
																	0.439592	0.69		0.146602	0.69
																	0.440003	0.691		0.146774	0.691
																	0.440415	0.692		0.146946	0.692
																	0.440826	0.693		0.147118	0.693
																	0.441236	0.694		0.14729	0.694
																	0.441647	0.695		0.147462	0.695
																	0.442057	0.696		0.147634	0.696
																	0.442467	0.697		0.147805	0.697
																	0.442876	0.698		0.147977	0.698
																	0.443285	0.699		0.148149	0.699
																	0.443694	0.7		0.14832	0.7
																	0.444103	0.701		0.148492	0.701
																	0.444511	0.702		0.148663	0.702
																	0.444919	0.703		0.148834	0.703
																	0.445327	0.704		0.149005	0.704
																	0.445734	0.705		0.149177	0.705
																	0.446141	0.706		0.149348	0.706
																	0.446548	0.707		0.149519	0.707
																	0.446955	0.708		0.14969	0.708
																	0.447361	0.709		0.149861	0.709
																	0.447767	0.71		0.150032	0.71
																	0.448173	0.711		0.150202	0.711
																	0.448578	0.712		0.150373	0.712
																	0.448983	0.713		0.150544	0.713
																	0.449388	0.714		0.150715	0.714
																	0.449793	0.715		0.150885	0.715
																	0.450197	0.716		0.151056	0.716
																	0.450601	0.717		0.151226	0.717
																	0.451005	0.718		0.151396	0.718
																	0.451408	0.719		0.151567	0.719
																	0.451811	0.72		0.151737	0.72
																	0.452214	0.721		0.151907	0.721
																	0.452617	0.722		0.152077	0.722
																	0.453019	0.723		0.152247	0.723
																	0.453421	0.724		0.152417	0.724
																	0.453823	0.725		0.152587	0.725
																	0.454224	0.726		0.152757	0.726
																	0.454625	0.727		0.152927	0.727
																	0.455026	0.728		0.153097	0.728
																	0.455427	0.729		0.153266	0.729
																	0.455827	0.73		0.153436	0.73
																	0.456227	0.731		0.153606	0.731
																	0.456627	0.732		0.153775	0.732
																	0.457026	0.733		0.153945	0.733
																	0.457425	0.734		0.154114	0.734
																	0.457824	0.735		0.154283	0.735
																	0.458223	0.736		0.154453	0.736
																	0.458621	0.737		0.154622	0.737
																	0.459019	0.738		0.154791	0.738
																	0.459417	0.739		0.15496	0.739
																	0.459815	0.74		0.155129	0.74
																	0.460212	0.741		0.155298	0.741
[truncated: 10,159 more rows]

## Sheet: HHU-1 virial fit
		R [J/mol/K]	virial fit from origin
		8.314	a0	-1135.96
			a1	192.964
			a2	-20.7514
			a3	4.73266
			a4	-0.50324
			n
			mmol/g	– Hads[J/mol]	–Hads[KJ/mol]
			0.01	9428.38	9.42838
			0.02	9412.39	9.41239
			0.03	9396.44	9.39644
			0.04	9380.51	9.38051
			0.05	9364.62	9.36462
			0.06	9348.77	9.34877
			0.07	9332.94	9.33294
			0.08	9317.15	9.31715
			0.09	9301.39	9.30139
			0.1	9285.67	9.28567
			0.12	9254.31	9.25431
			0.14	9223.08	9.22308
			0.16	9191.98	9.19198
			0.18	9161	9.161
			0.2	9130.14	9.13014
			0.22	9099.41	9.09941
			0.24	9068.79	9.06879
			0.26	9038.28	9.03828
			0.28	9007.89	9.00789
			0.3	8977.62	8.97762
			0.32	8947.46	8.94746
			0.34	8917.4	8.9174
			0.36	8887.46	8.88746
			0.38	8857.62	8.85762
			0.4	8827.88	8.82788
			0.42	8798.25	8.79825
			0.44	8768.72	8.76872
			0.46	8739.3	8.7393
			0.48	8709.97	8.70997
			0.5	8680.73	8.68073
			0.52	8651.6	8.6516
			0.54	8622.56	8.62256
			0.56	8593.61	8.59361
			0.58	8564.75	8.56475
			0.6	8535.98	8.53598
			0.62	8507.3	8.5073
			0.64	8478.71	8.47871
			0.66	8450.21	8.45021
			0.68	8421.78	8.42178
			0.7	8393.45	8.39345
			0.72	8365.19	8.36519
			0.74	8337.01	8.33701
			0.76	8308.92	8.30892
			0.78	8280.9	8.2809
			0.8	8252.95	8.25295
			0.82	8225.09	8.22509
			0.84	8197.29	8.19729
			0.86	8169.57	8.16957
			0.88	8141.92	8.14192
			0.9	8114.35	8.11435
			0.92	8086.84	8.08684
			0.94	8059.4	8.0594
			0.96	8032.02	8.03202
			0.98	8004.71	8.00471
			1	7977.47	7.97747
			1.02	7950.29	7.95029
			1.04	7923.18	7.92318
			1.06	7896.12	7.89612
			1.08	7869.12	7.86912
			1.1	7842.19	7.84219
			1.12	7815.31	7.81531
			1.14	7788.49	7.78849
			1.16	7761.73	7.76173
			1.18	7735.02	7.73502
			1.2	7708.37	7.70837
			1.22	7681.77	7.68177
			1.24	7655.22	7.65522
			1.26	7628.73	7.62873
			1.28	7602.28	7.60228
			1.3	7575.89	7.57589
			1.32	7549.55	7.54955
			1.34	7523.25	7.52325
			1.36	7497	7.497
			1.38	7470.8	7.4708
			1.4	7444.64	7.44464
			1.42	7418.53	7.41853
			1.44	7392.47	7.39247
			1.46	7366.44	7.36644
			1.48	7340.46	7.34046
			1.5	7314.53	7.31453
			1.52	7288.63	7.28863
			1.54	7262.77	7.26277
			1.56	7236.96	7.23696
			1.58	7211.18	7.21118
			1.6	7185.45	7.18545
			1.62	7159.75	7.15975
			1.64	7134.09	7.13409
			1.66	7108.47	7.10847
			1.68	7082.88	7.08288
			1.7	7057.33	7.05733
			1.72	7031.81	7.03181
			1.74	7006.33	7.00633
			1.76	6980.89	6.98089
			1.78	6955.48	6.95548
			1.8	6930.1	6.9301
			1.82	6904.76	6.90476
			1.84	6879.44	6.87944
			1.86	6854.16	6.85416
			1.88	6828.92	6.82892
			1.9	6803.7	6.8037
			1.92	6778.51	6.77851
			1.94	6753.36	6.75336
			1.96	6728.24	6.72824
			1.98	6703.14	6.70314
			2	6678.08	6.67808
			2.02	6653.04	6.65304
			2.04	6628.04	6.62804
			2.06	6603.06	6.60306
			2.08	6578.11	6.57811
			2.1	6553.19	6.55319
			2.12	6528.3	6.5283
			2.14	6503.44	6.50344
			2.16	6478.6	6.4786
			2.18	6453.8	6.4538
			2.2	6429.02	6.42902
			2.22	6404.26	6.40426
			2.24	6379.54	6.37954
			2.26	6354.84	6.35484
			2.28	6330.17	6.33017
			2.3	6305.53	6.30553
			2.32	6280.91	6.28091
			2.34	6256.32	6.25632
			2.36	6231.76	6.23176
			2.38	6207.22	6.20722
			2.4	6182.71	6.18271
			2.42	6158.23	6.15823
			2.44	6133.78	6.13378
