# Supplementary material for: A practical guide to calculate the isosteric heat/enthalpy of adsorption via adsorption isotherms in metal–organic frameworks, MOFs
Source: Royal Society of Chemistry journal article supplement (doi:10.1039/d0dt01784a), 2020-01-01
Supplement: d0dt01784a3.pdf [file d0dt01784a3.pdf]

# Freundlich-Langmuir fitting

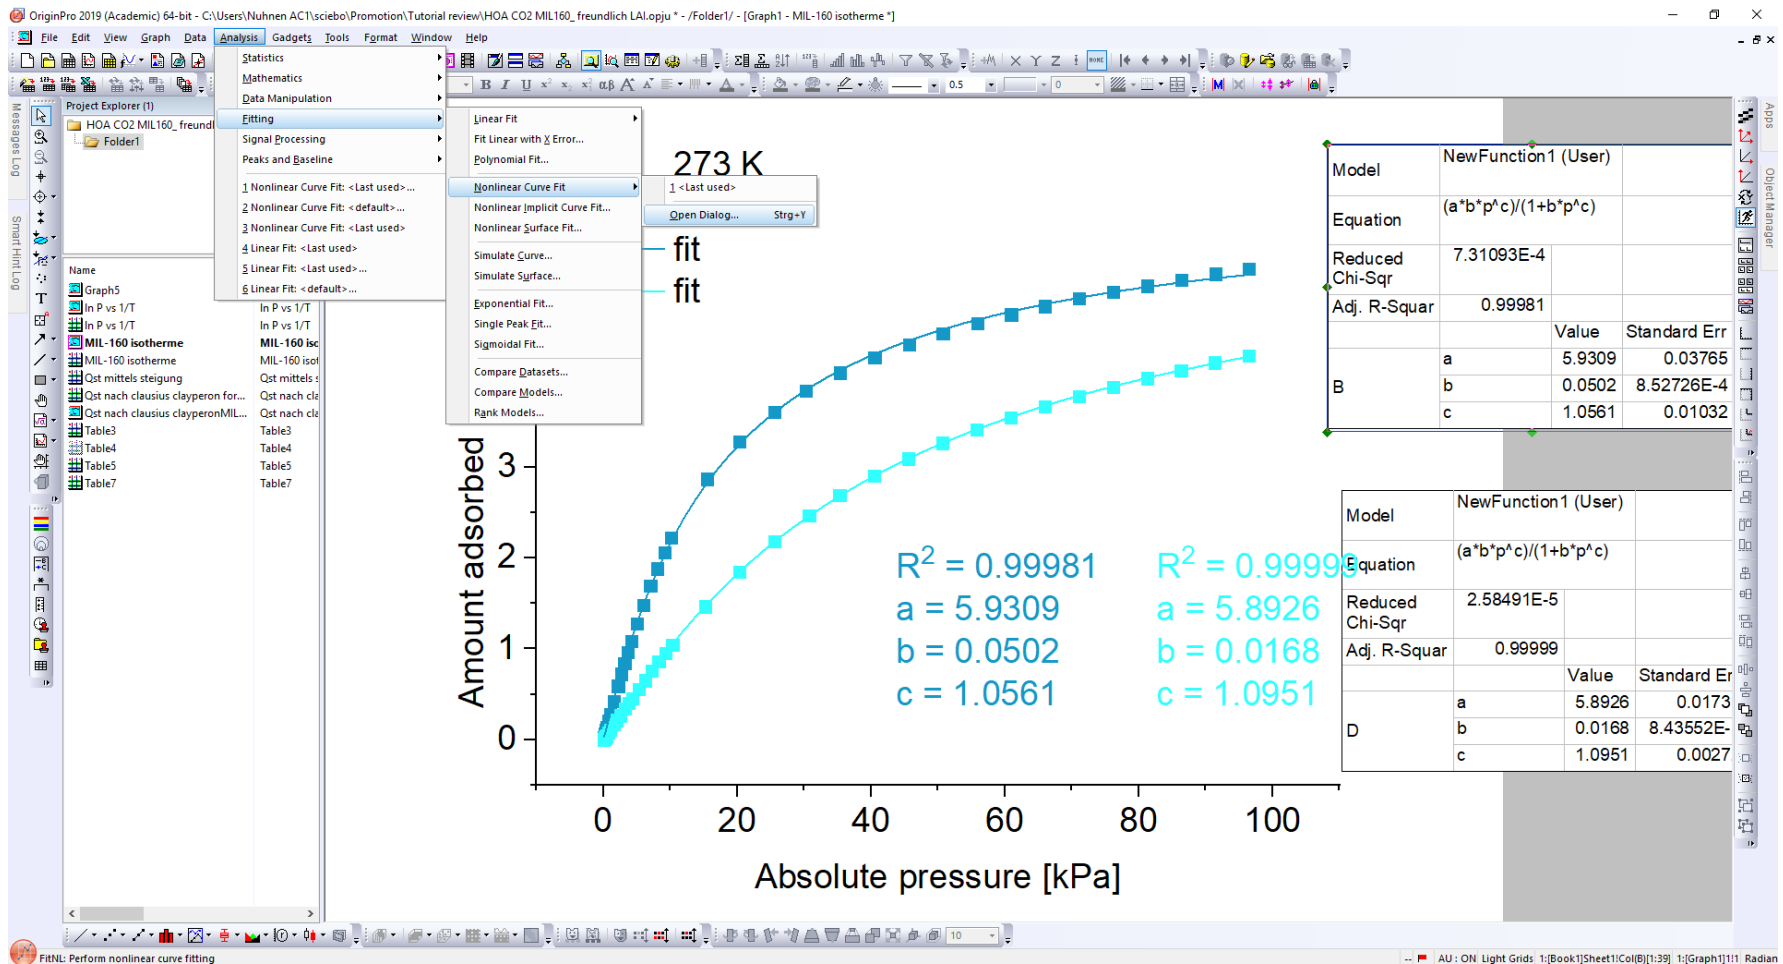

The screenshot shows the OriginPro 2019 interface. The main window displays a graph with 'Absolute pressure [kPa]' on the x-axis (0 to 100) and a y-axis labeled '273 K'. A 'Fitting Function Builder - Variables and Parameters - Freundlichlangmuir' dialog box is open, showing the following settings:

- Independent Variables: p
- Dependent Variables: n
- Parameters: a,b,c
- Derived Parameters: (empty)
- Constants: (empty)
- Peak Function:

Two summary tables are shown on the right side of the image:

| Model C         |                       | Value  |            | Standard Err |  |
|-----------------|-----------------------|--------|------------|--------------|--|
| Model           | NewFunction1 (User)   |        |            |              |  |
| Equation        | $(a*b*p^c)/(1+b*p^c)$ |        |            |              |  |
| Reduced Chi-Sqr | 7.31093E-4            |        |            |              |  |
| Adj. R-Sqvar    | 0.99981               |        |            |              |  |
| B               | a                     | 5.9309 | 0.03765    |              |  |
|                 | b                     | 0.0502 | 8.52726E-4 |              |  |
|                 | c                     | 1.0561 | 0.01032    |              |  |

  

| Model D         |                       | Value  |            | Standard Err |  |
|-----------------|-----------------------|--------|------------|--------------|--|
| Model           | NewFunction1 (User)   |        |            |              |  |
| Equation        | $(a*b*p^c)/(1+b*p^c)$ |        |            |              |  |
| Reduced Chi-Sqr | 2.58491E-5            |        |            |              |  |
| Adj. R-Sqvar    | 0.99999               |        |            |              |  |
| D               | a                     | 5.8926 | 0.0173     |              |  |
|                 | b                     | 0.0168 | 8.43552E-5 |              |  |
|                 | c                     | 1.0951 | 0.0027     |              |  |

The screenshot shows the OriginPro 2019 interface. A graph at the bottom displays 'Absolute pressure [kPa]' on the x-axis, ranging from 0 to 100. A 'Fitting Function Builder' dialog box is open, showing the following details:

- Parameters:**

| Param | Unit | Meaning | Fixed                    | Initial Value | Significant Digits |
|-------|------|---------|--------------------------|---------------|--------------------|
| a     | ?    |         | <input type="checkbox"/> | 1             | System             |
| b     | ?    |         | <input type="checkbox"/> | 1             | System             |
| c     | ?    |         | <input type="checkbox"/> | 1             | System             |
- Function Body:**  $n = \frac{a \cdot b \cdot p^c}{1 + b \cdot p^c}$
- Quick Check:**
  - P = 1
  - n = 0.5

Two summary tables are overlaid on the right side of the image:

| Model           | NewFunction1 (User)                         | Value  | Standard Err |
|-----------------|---------------------------------------------|--------|--------------|
| Equation        | $(a \cdot b \cdot p^c) / (1 + b \cdot p^c)$ |        |              |
| Reduced Chi-Sqr | 7.31093E-4                                  |        |              |
| Adj. R-Squar    | 0.99981                                     |        |              |
| B               | a                                           | 5.9309 | 0.03765      |
|                 | b                                           | 0.0502 | 8.52726E-4   |
|                 | c                                           | 1.0561 | 0.01032      |

  

| Model           | NewFunction1 (User)                         | Value  | Standard Err |
|-----------------|---------------------------------------------|--------|--------------|
| Equation        | $(a \cdot b \cdot p^c) / (1 + b \cdot p^c)$ |        |              |
| Reduced Chi-Sqr | 2.58491E-5                                  |        |              |
| Adj. R-Squar    | 0.99999                                     |        |              |
| D               | a                                           | 5.8926 | 0.0173       |
|                 | b                                           | 0.0168 | 8.43552E-    |
|                 | c                                           | 1.0951 | 0.0027       |

# Virial analysis

## Origin

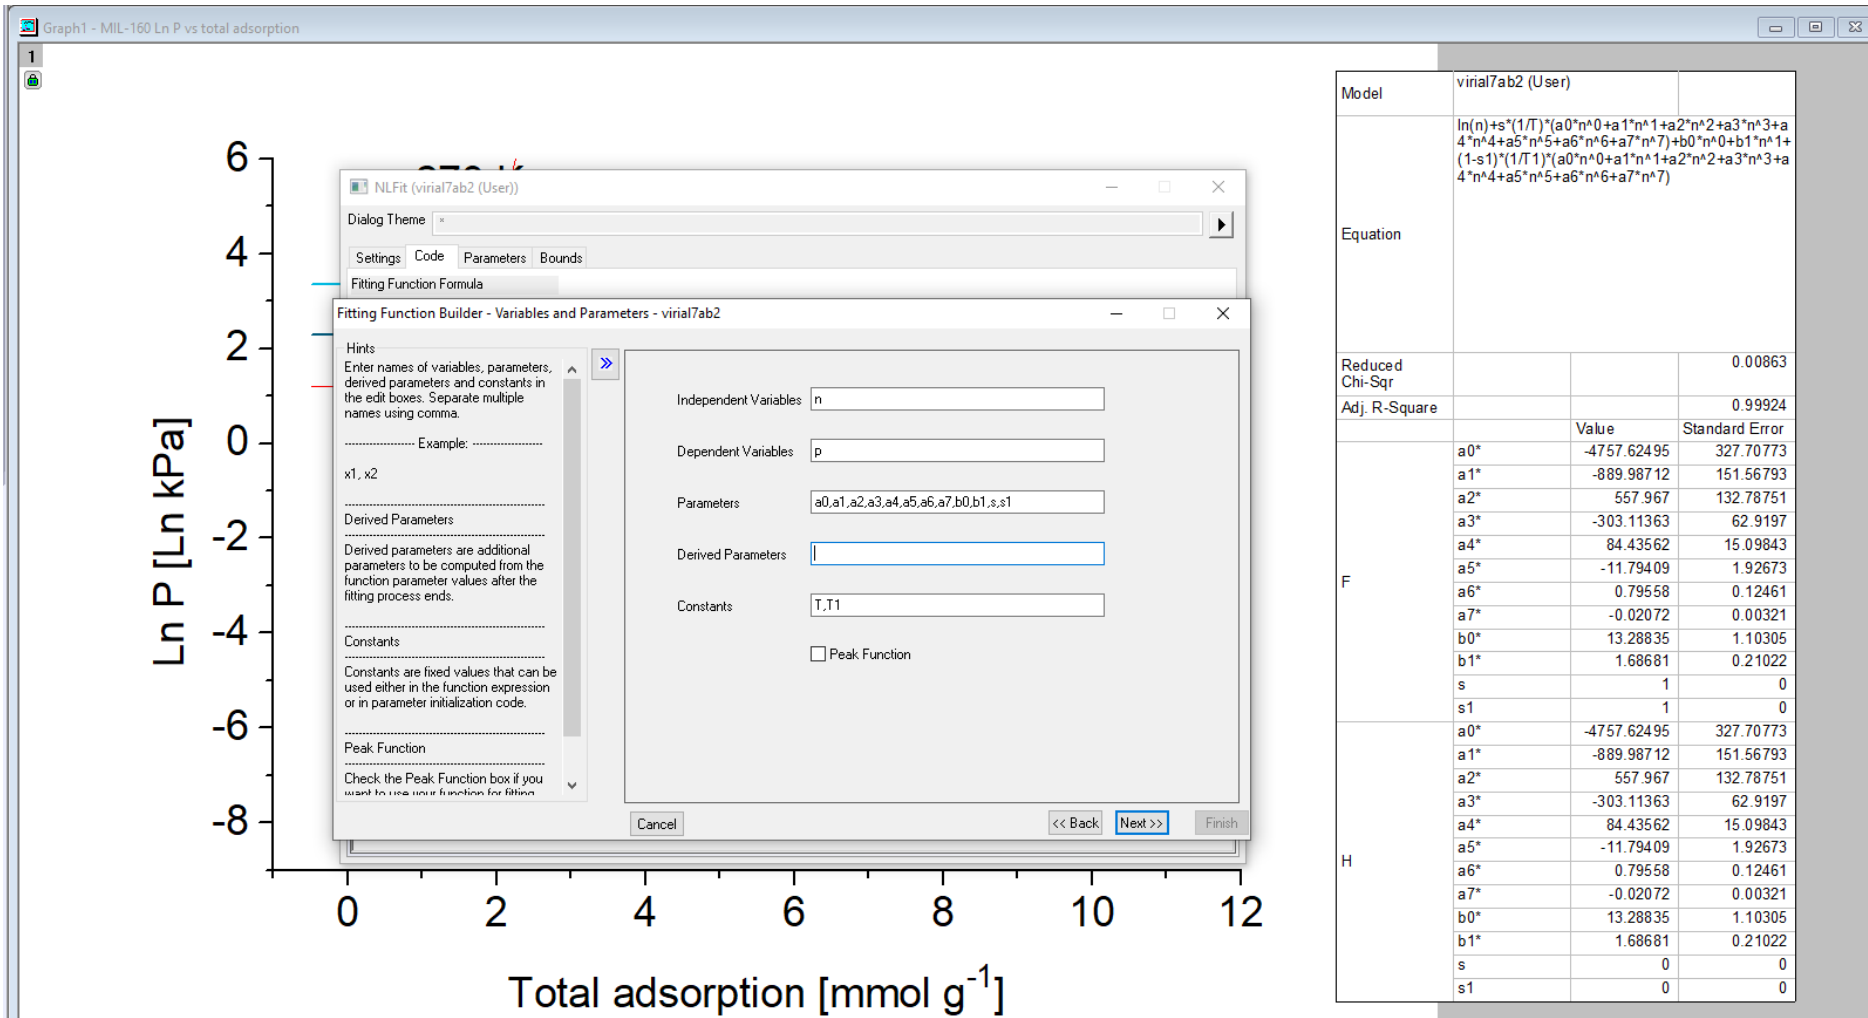

## Origin

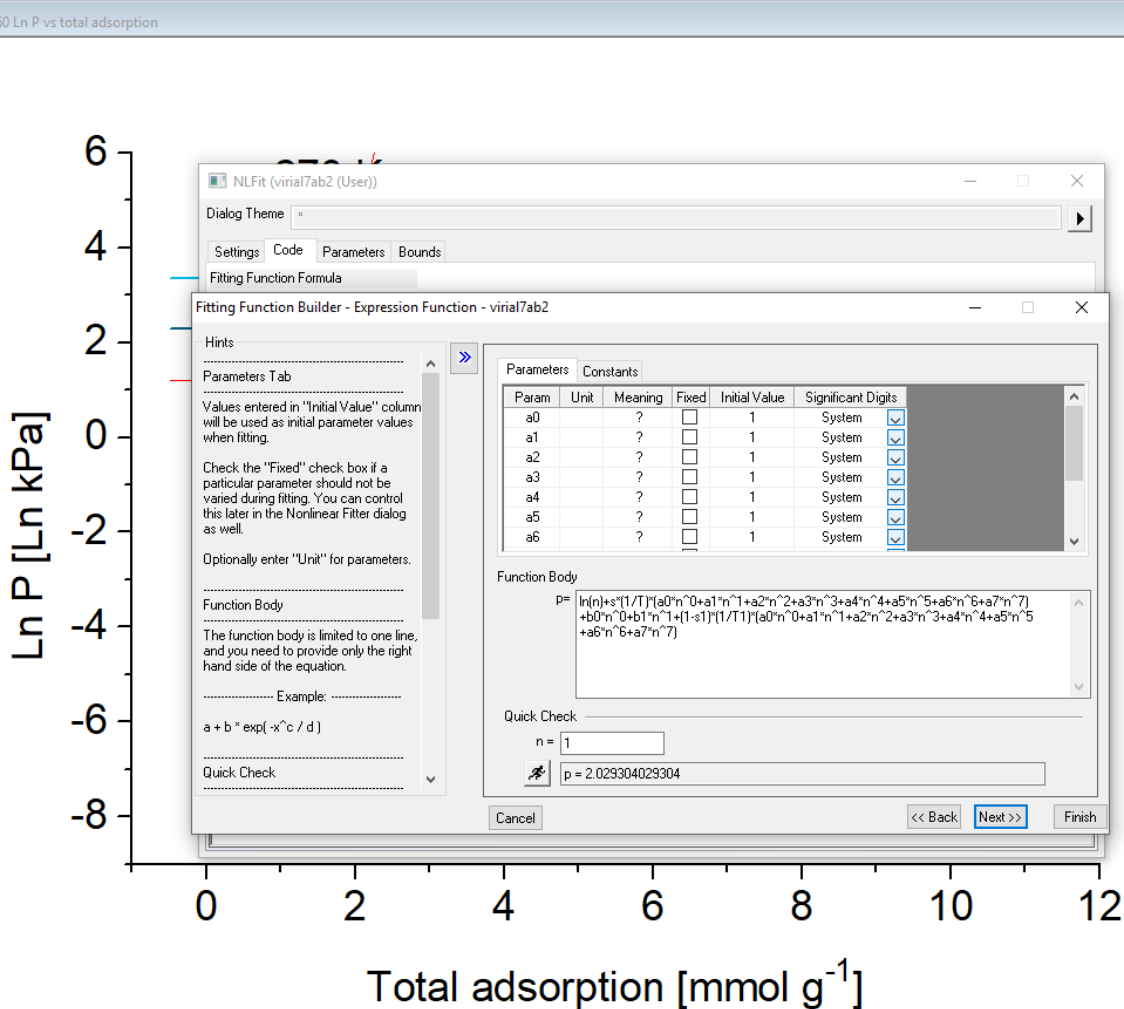

| Model           | virial7ab2 (User)                                                                                                                                                                                                                                                                                                                                        |             |                |
|-----------------|----------------------------------------------------------------------------------------------------------------------------------------------------------------------------------------------------------------------------------------------------------------------------------------------------------------------------------------------------------|-------------|----------------|
| Equation        | $\ln(n) + s \cdot (1/T) \cdot (a_0 \cdot n^0 + a_1 \cdot n^1 + a_2 \cdot n^2 + a_3 \cdot n^3 + a_4 \cdot n^4 + a_5 \cdot n^5 + a_6 \cdot n^6 + a_7 \cdot n^7) + b_0 \cdot n^0 + b_1 \cdot n^1 + (1-s) \cdot (1/T) \cdot (a_0 \cdot n^0 + a_1 \cdot n^1 + a_2 \cdot n^2 + a_3 \cdot n^3 + a_4 \cdot n^4 + a_5 \cdot n^5 + a_6 \cdot n^6 + a_7 \cdot n^7)$ |             |                |
| Reduced Chi-Sqr |                                                                                                                                                                                                                                                                                                                                                          | 0.00863     |                |
| Adj. R-Square   |                                                                                                                                                                                                                                                                                                                                                          | 0.99924     |                |
| F               |                                                                                                                                                                                                                                                                                                                                                          | Value       | Standard Error |
|                 | a0*                                                                                                                                                                                                                                                                                                                                                      | -4757.62495 | 327.70773      |
|                 | a1*                                                                                                                                                                                                                                                                                                                                                      | -889.98712  | 151.56793      |
|                 | a2*                                                                                                                                                                                                                                                                                                                                                      | 557.967     | 132.78751      |
|                 | a3*                                                                                                                                                                                                                                                                                                                                                      | -303.11363  | 62.9197        |
|                 | a4*                                                                                                                                                                                                                                                                                                                                                      | 84.43562    | 15.09843       |
|                 | a5*                                                                                                                                                                                                                                                                                                                                                      | -11.79409   | 1.92673        |
|                 | a6*                                                                                                                                                                                                                                                                                                                                                      | 0.79558     | 0.12461        |
|                 | a7*                                                                                                                                                                                                                                                                                                                                                      | -0.02072    | 0.00321        |
|                 | b0*                                                                                                                                                                                                                                                                                                                                                      | 13.28835    | 1.10305        |
|                 | b1*                                                                                                                                                                                                                                                                                                                                                      | 1.68681     | 0.21022        |
|                 | s                                                                                                                                                                                                                                                                                                                                                        | 1           | 0              |
|                 | s1                                                                                                                                                                                                                                                                                                                                                       | 1           | 0              |
| H               | a0*                                                                                                                                                                                                                                                                                                                                                      | -4757.62495 | 327.70773      |
|                 | a1*                                                                                                                                                                                                                                                                                                                                                      | -889.98712  | 151.56793      |
|                 | a2*                                                                                                                                                                                                                                                                                                                                                      | 557.967     | 132.78751      |
|                 | a3*                                                                                                                                                                                                                                                                                                                                                      | -303.11363  | 62.9197        |
|                 | a4*                                                                                                                                                                                                                                                                                                                                                      | 84.43562    | 15.09843       |
|                 | a5*                                                                                                                                                                                                                                                                                                                                                      | -11.79409   | 1.92673        |
|                 | a6*                                                                                                                                                                                                                                                                                                                                                      | 0.79558     | 0.12461        |
|                 | a7*                                                                                                                                                                                                                                                                                                                                                      | -0.02072    | 0.00321        |
|                 | b0*                                                                                                                                                                                                                                                                                                                                                      | 13.28835    | 1.10305        |
|                 | b1*                                                                                                                                                                                                                                                                                                                                                      | 1.68681     | 0.21022        |
|                 | s                                                                                                                                                                                                                                                                                                                                                        | 0           | 0              |
|                 | s1                                                                                                                                                                                                                                                                                                                                                       | 0           | 0              |

## Origin

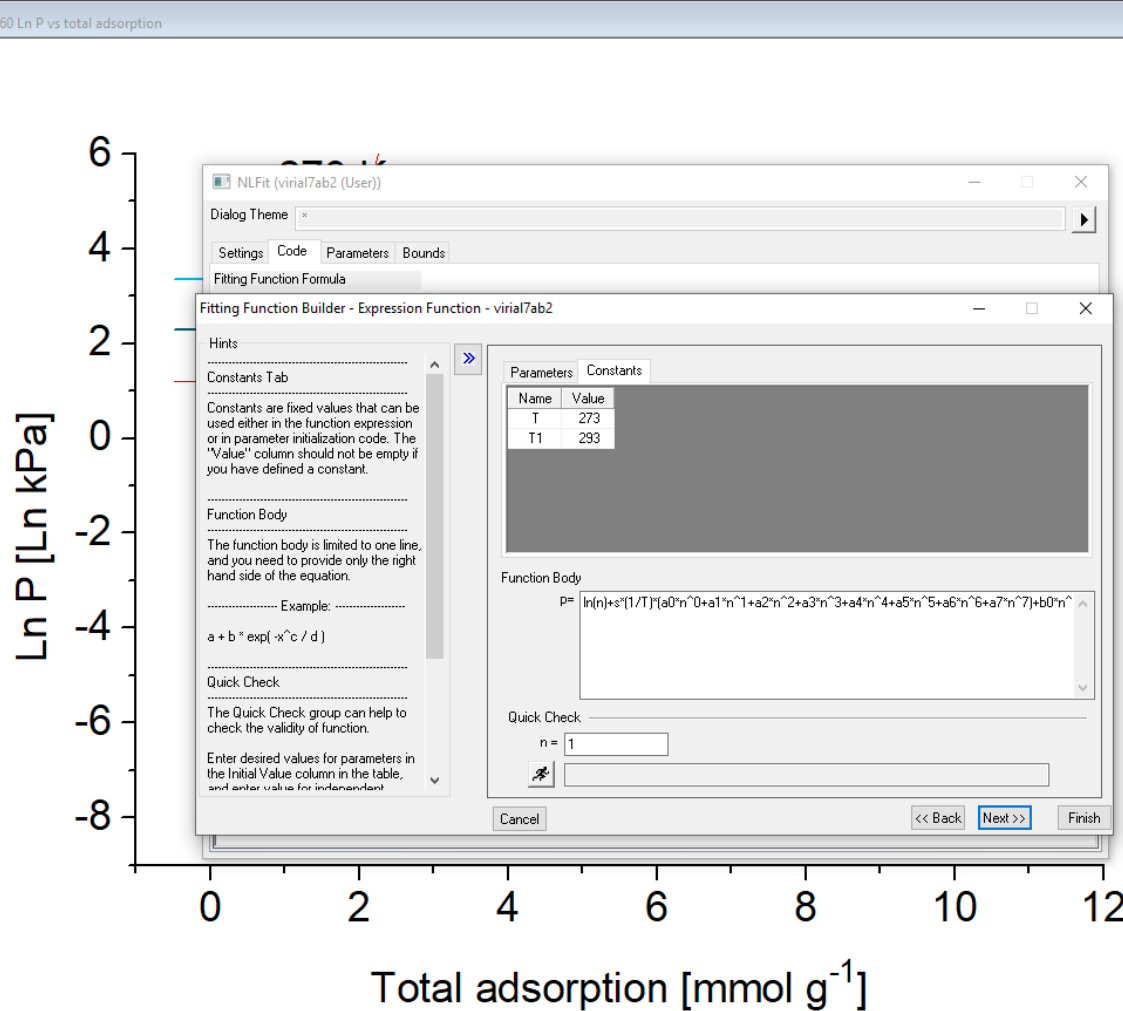

| Model           | virial7ab2 (User)                                                                                                                                                                                                                                                                                                                                        |                |             |
|-----------------|----------------------------------------------------------------------------------------------------------------------------------------------------------------------------------------------------------------------------------------------------------------------------------------------------------------------------------------------------------|----------------|-------------|
| Equation        | $\ln(n) + s \cdot (1/T) \cdot (a_0 \cdot n^0 + a_1 \cdot n^1 + a_2 \cdot n^2 + a_3 \cdot n^3 + a_4 \cdot n^4 + a_5 \cdot n^5 + a_6 \cdot n^6 + a_7 \cdot n^7) + b_0 \cdot n^0 + b_1 \cdot n^1 + (1-s) \cdot (1/T) \cdot (a_0 \cdot n^0 + a_1 \cdot n^1 + a_2 \cdot n^2 + a_3 \cdot n^3 + a_4 \cdot n^4 + a_5 \cdot n^5 + a_6 \cdot n^6 + a_7 \cdot n^7)$ |                |             |
| Reduced Chi-Sqr |                                                                                                                                                                                                                                                                                                                                                          | 0.00863        |             |
| Adj. R-Square   |                                                                                                                                                                                                                                                                                                                                                          | 0.99924        |             |
| F               | Value                                                                                                                                                                                                                                                                                                                                                    | Standard Error |             |
|                 | a0*                                                                                                                                                                                                                                                                                                                                                      | -4757.62495    | 327.70773   |
|                 | a1*                                                                                                                                                                                                                                                                                                                                                      | -889.98712     | 151.56793   |
|                 | a2*                                                                                                                                                                                                                                                                                                                                                      | 557.967        | 132.78751   |
|                 | a3*                                                                                                                                                                                                                                                                                                                                                      | -303.11363     | 62.9197     |
|                 | a4*                                                                                                                                                                                                                                                                                                                                                      | 84.43562       | 15.09843    |
|                 | a5*                                                                                                                                                                                                                                                                                                                                                      | -11.79409      | 1.92673     |
|                 | a6*                                                                                                                                                                                                                                                                                                                                                      | 0.79558        | 0.12461     |
|                 | a7*                                                                                                                                                                                                                                                                                                                                                      | -0.02072       | 0.00321     |
|                 | b0*                                                                                                                                                                                                                                                                                                                                                      | 13.28835       | 1.10305     |
|                 | b1*                                                                                                                                                                                                                                                                                                                                                      | 1.68681        | 0.21022     |
|                 | s                                                                                                                                                                                                                                                                                                                                                        | 1              | 0           |
|                 | s1                                                                                                                                                                                                                                                                                                                                                       | 1              | 0           |
|                 | H                                                                                                                                                                                                                                                                                                                                                        | a0*            | -4757.62495 |
| a1*             |                                                                                                                                                                                                                                                                                                                                                          | -889.98712     | 151.56793   |
| a2*             |                                                                                                                                                                                                                                                                                                                                                          | 557.967        | 132.78751   |
| a3*             |                                                                                                                                                                                                                                                                                                                                                          | -303.11363     | 62.9197     |
| a4*             |                                                                                                                                                                                                                                                                                                                                                          | 84.43562       | 15.09843    |
| a5*             |                                                                                                                                                                                                                                                                                                                                                          | -11.79409      | 1.92673     |
| a6*             |                                                                                                                                                                                                                                                                                                                                                          | 0.79558        | 0.12461     |
| a7*             |                                                                                                                                                                                                                                                                                                                                                          | -0.02072       | 0.00321     |
| b0*             |                                                                                                                                                                                                                                                                                                                                                          | 13.28835       | 1.10305     |
| b1*             |                                                                                                                                                                                                                                                                                                                                                          | 1.68681        | 0.21022     |
| s               |                                                                                                                                                                                                                                                                                                                                                          | 0              | 0           |
| s1              |                                                                                                                                                                                                                                                                                                                                                          | 0              | 0           |



## Origin

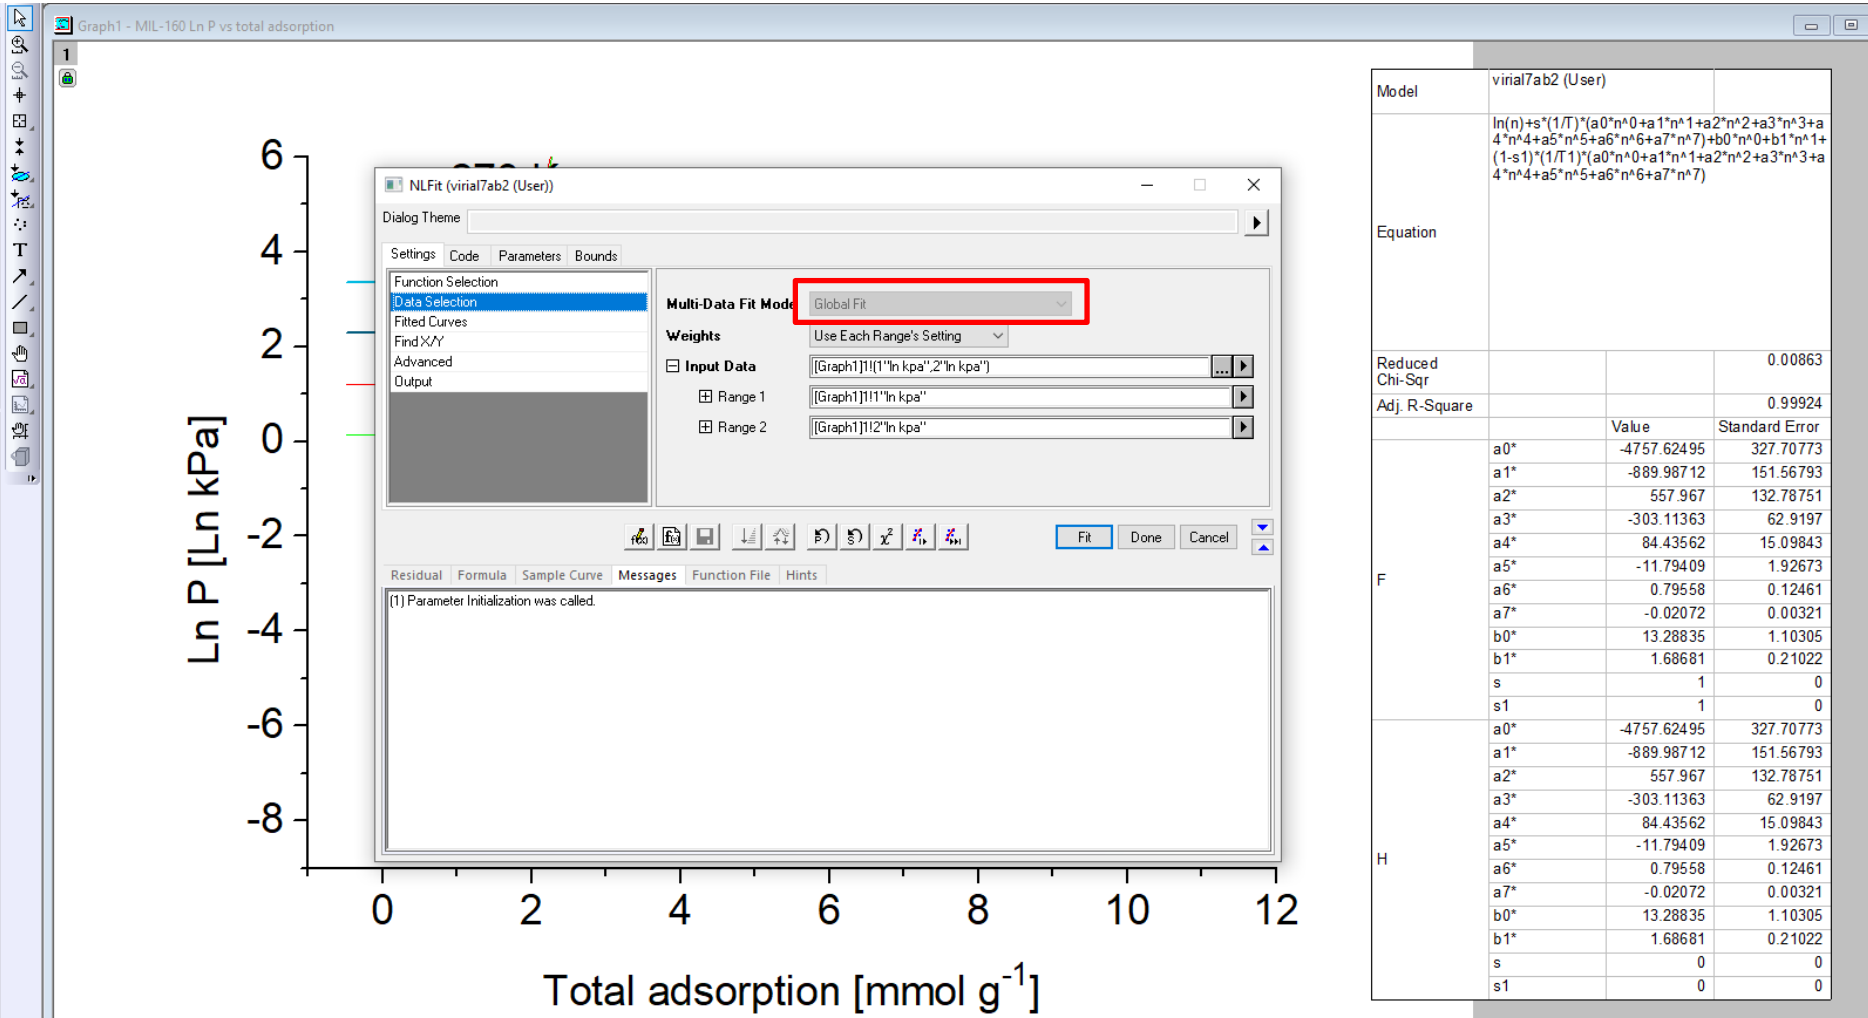

## Origin

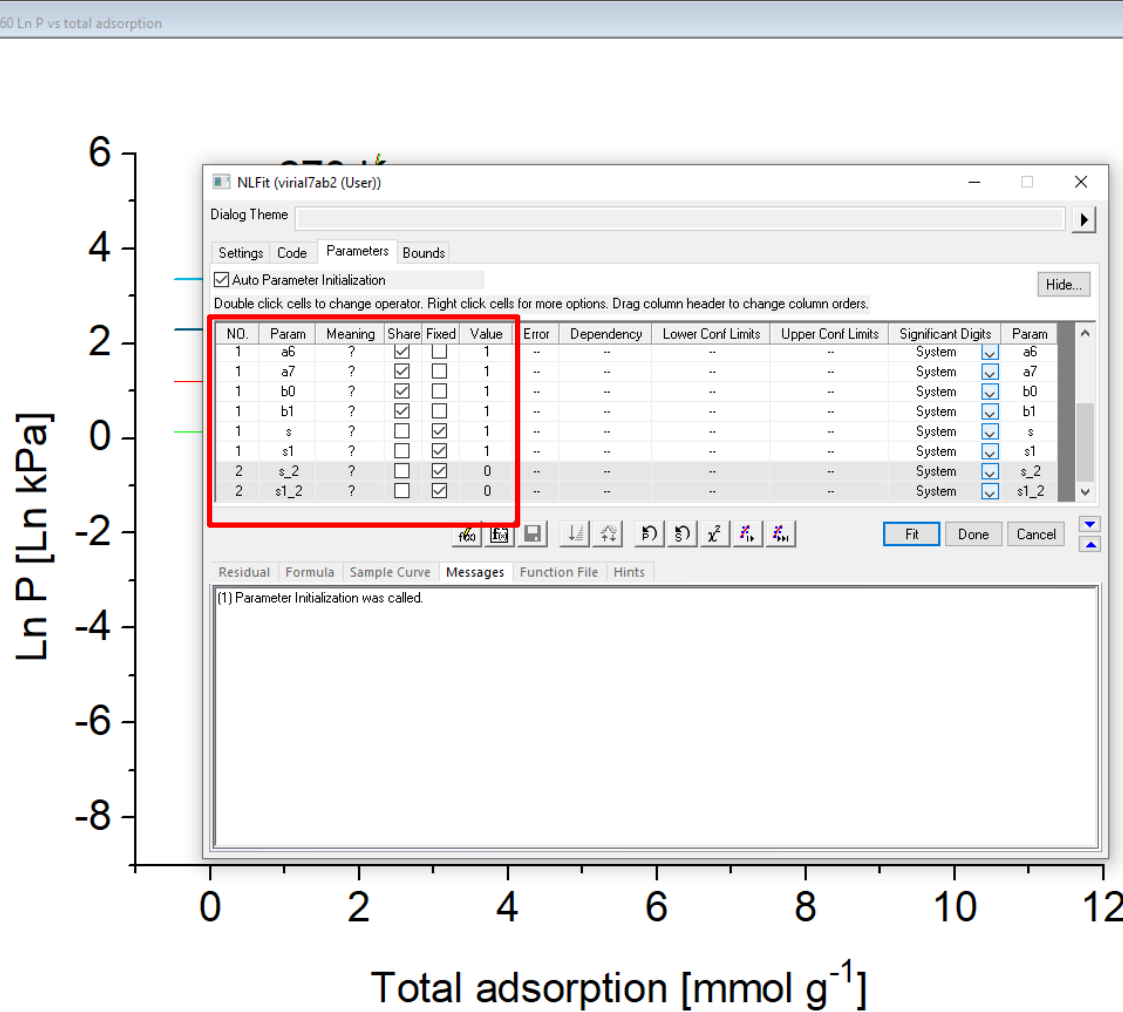

| Model           |     | virial7ab2 (User)                                                                                                                                                                                                                                                                                                                                        |                |
|-----------------|-----|----------------------------------------------------------------------------------------------------------------------------------------------------------------------------------------------------------------------------------------------------------------------------------------------------------------------------------------------------------|----------------|
| Equation        |     | $\ln(n) + s \cdot (1/T) \cdot (a_0 \cdot n^0 + a_1 \cdot n^1 + a_2 \cdot n^2 + a_3 \cdot n^3 + a_4 \cdot n^4 + a_5 \cdot n^5 + a_6 \cdot n^6 + a_7 \cdot n^7) + b_0 \cdot n^0 + b_1 \cdot n^1 + (1-s) \cdot (1/T) \cdot (a_0 \cdot n^0 + a_1 \cdot n^1 + a_2 \cdot n^2 + a_3 \cdot n^3 + a_4 \cdot n^4 + a_5 \cdot n^5 + a_6 \cdot n^6 + a_7 \cdot n^7)$ |                |
| Reduced Chi-Sqr |     |                                                                                                                                                                                                                                                                                                                                                          | 0.00863        |
| Adj. R-Square   |     |                                                                                                                                                                                                                                                                                                                                                          | 0.99924        |
|                 |     | Value                                                                                                                                                                                                                                                                                                                                                    | Standard Error |
| F               | a0* | -4757.62495                                                                                                                                                                                                                                                                                                                                              | 327.70773      |
|                 | a1* | -889.98712                                                                                                                                                                                                                                                                                                                                               | 151.56793      |
|                 | a2* | 557.967                                                                                                                                                                                                                                                                                                                                                  | 132.78751      |
|                 | a3* | -303.11363                                                                                                                                                                                                                                                                                                                                               | 62.9197        |
|                 | a4* | 84.43562                                                                                                                                                                                                                                                                                                                                                 | 15.09843       |
|                 | a5* | -11.79409                                                                                                                                                                                                                                                                                                                                                | 1.92673        |
|                 | a6* | 0.79558                                                                                                                                                                                                                                                                                                                                                  | 0.12461        |
|                 | a7* | -0.02072                                                                                                                                                                                                                                                                                                                                                 | 0.00321        |
|                 | b0* | 13.28835                                                                                                                                                                                                                                                                                                                                                 | 1.10305        |
|                 | b1* | 1.68681                                                                                                                                                                                                                                                                                                                                                  | 0.21022        |
|                 | s   | 1                                                                                                                                                                                                                                                                                                                                                        | 0              |
| s1              | 1   | 0                                                                                                                                                                                                                                                                                                                                                        |                |
| H               | a0* | -4757.62495                                                                                                                                                                                                                                                                                                                                              | 327.70773      |
|                 | a1* | -889.98712                                                                                                                                                                                                                                                                                                                                               | 151.56793      |
|                 | a2* | 557.967                                                                                                                                                                                                                                                                                                                                                  | 132.78751      |
|                 | a3* | -303.11363                                                                                                                                                                                                                                                                                                                                               | 62.9197        |
|                 | a4* | 84.43562                                                                                                                                                                                                                                                                                                                                                 | 15.09843       |
|                 | a5* | -11.79409                                                                                                                                                                                                                                                                                                                                                | 1.92673        |
|                 | a6* | 0.79558                                                                                                                                                                                                                                                                                                                                                  | 0.12461        |
|                 | a7* | -0.02072                                                                                                                                                                                                                                                                                                                                                 | 0.00321        |
|                 | b0* | 13.28835                                                                                                                                                                                                                                                                                                                                                 | 1.10305        |
|                 | b1* | 1.68681                                                                                                                                                                                                                                                                                                                                                  | 0.21022        |
|                 | s   | 0                                                                                                                                                                                                                                                                                                                                                        | 0              |
| s1              | 0   | 0                                                                                                                                                                                                                                                                                                                                                        |                |
